# Supplementary material for: Elucidating the structures and cooperative binding mechanism of cesium salts to the multitopic ion-pair receptor through density functional theory calculations
Source: Royal Society of Chemistry journal article supplement (doi:10.1039/c5dt01095k), 2015-01-01
Supplement: c5dt01095k1.pdf [file c5dt01095k1.pdf]

## Supporting Information

# Elucidating the Structures and Cooperative Binding Mechanism of Cesium Salts to Multi-topic Ion-Pair Receptor through Density Functional Theory Calculation

*Biswajit Sadhu,<sup>(1)</sup> Mahesh Sundararajan,<sup>(2)</sup>\* Gunasekaran Velmurugan<sup>(3)</sup> and Ponnambalam Venuvanalingam<sup>(3)</sup>\**

<sup>1</sup>Radiation Safety Systems Division, <sup>2</sup>Theoretical Chemistry Section,

Bhabha Atomic Research Centre, Mumbai– 400085, India.

<sup>3</sup>School of Chemistry, Bharathidasan University, Tiruchirappalli-620024

TableS1. Optimized geometric parameters (Å) of Receptor-Cs<sup>+</sup>Cl<sup>-</sup> complex in C/P binding mode at various levels.

| Optimization Level | Medium | Cs-O <sub>C</sub> | Cs-C <sub>A</sub> | Cl-N <sub>P</sub> | RMSD <sup>a</sup> |
|--------------------|--------|-------------------|-------------------|-------------------|-------------------|
| BP86/B1            | ε=80   | 2.94-3.12         | 3.44-3.45         | 3.21-3.23         | 0.26              |
| BP86-D3/B1         | ε=80   | 2.96-3.17         | 3.42-3.56         | 3.19-3.23         | 0.39              |
| BP86/B2            | ε=80   | 2.93-3.13         | 3.48-3.53         | 3.25-3.27         | 0.26              |
| BP86/B1            | ε=1    | 2.88-3.15         | 3.45-3.50         | 3.23-3.25         | 0.34              |
| BP86-D3/B1         | ε=1    | 2.89-3.19         | 3.44-3.52         | 3.21-3.27         | 0.56              |
| X-ray              | -      | 2.84-3.10         | 3.29-3.40         | 3.22-3.30         | -                 |

<sup>a</sup>RMSD values are calculated with respect to X-ray structures.

Table S2. Computed binding affinities (kcal mol<sup>-1</sup>) of CsCl in Receptor at C/P binding mode.

| DFT level for energetics | Medium        | Binding affinity |
|--------------------------|---------------|------------------|
| B3LYP-D3/B2//BP86/B1     | $\epsilon=80$ | -28.67           |
| B3LYP-D3/B2//BP86/B2     | $\epsilon=80$ | -32.28           |

Table S3: Hydration free energy (kcal mol<sup>-1</sup>) of ions calculated at B3LYP-D3/B2//BP86/B1 level

| Hydrated ion                                                 | Hydration free energy |                           |
|--------------------------------------------------------------|-----------------------|---------------------------|
|                                                              | Calculated            | Experimental <sup>a</sup> |
| Cs(H <sub>2</sub> O) <sub>6</sub> <sup>+</sup>               | -71.43                | -59.80                    |
| F(H <sub>2</sub> O) <sub>6</sub> <sup>-</sup>                | -120.55               | -111.24                   |
| Cl(H <sub>2</sub> O) <sub>6</sub> <sup>-</sup>               | -79.79                | -81.34                    |
| Br(H <sub>2</sub> O) <sub>6</sub> <sup>-</sup>               | -69.88                | -75.36                    |
| I(H <sub>2</sub> O) <sub>6</sub> <sup>-</sup>                | -66.63                | -65.79                    |
| NO <sub>3</sub> (H <sub>2</sub> O) <sub>6</sub> <sup>-</sup> | -70.36                | -71.77                    |

<sup>a</sup>experimental values are taken from ref no. 59

Table S4.

Optimized geometric parameters (Å) and binding affinities (kcal mol<sup>-1</sup>) of Receptor-Cs<sup>+</sup>Cl<sup>-</sup>.H<sub>2</sub>O complexes.

| Receptor.Cs <sup>+</sup> Cl <sup>-</sup> .H <sub>2</sub> O | Epsilon (ε)      | Cs-O <sub>C/G</sub> | Cs-C <sub>A</sub> | Cs-N <sub>P</sub> | Cl-N <sub>P</sub> | Binding energy       |
|------------------------------------------------------------|------------------|---------------------|-------------------|-------------------|-------------------|----------------------|
|                                                            |                  | BP86/B1             |                   |                   |                   | B3LYP-D3/B2//BP86/B1 |
| G/P                                                        | 80               | 3.10-4.47           | 3.39-3.55         | -                 | 3.25-3.27         | -29.45               |
|                                                            | 5.5              | 3.10-4.57           | 3.38-3.57         | -                 | 3.26-3.30         | -44.95               |
| C/P                                                        | 80               | 2.92-3.11           | 3.45-3.51         | -                 | 3.23-3.26         | -32.62               |
|                                                            | 5.5              | 2.91-3.12           | 3.45-3.52         | -                 | 3.24-3.27         | -45.28               |
|                                                            | Exp <sup>a</sup> | 2.84-3.10           | 3.29-3.40         | -                 | 3.23-3.31         | -                    |
| P/P                                                        | 80               | -                   | -                 | 3.53-3.58         | 3.24-3.29         | -29.57               |
|                                                            | 5.5              | -                   | -                 | 3.46-3.51         | 3.24-3.28         | -37.91               |

<sup>a</sup>Experimental values are taken from ref. no 25

Table S5.

Topological properties of Receptor-Cs<sup>+</sup>F<sup>-</sup> (C/P) computed at BP86/B2 level.  $\rho(r)$  in units of  $e\text{\AA}^{-3}$ ,  $L(r)$  in units of  $e\text{\AA}^{-3}$ ,  $G(r)$ ,  $V(r)$ ,  $H(r)$  in units of a.u.  $\text{\AA}^{-3}$ .

| Receptor-Cs <sup>+</sup> F <sup>-</sup> (C/P)   |           |         |        |         |               |        |              |
|-------------------------------------------------|-----------|---------|--------|---------|---------------|--------|--------------|
| BCP                                             | $\rho(r)$ | $L(r)$  | $G(r)$ | $H(r)$  | $\varepsilon$ | $V(r)$ | $-V(r)/G(r)$ |
| N-H <sup>...</sup> F                            | 0.0461    | -0.0353 | 0.0403 | -0.0050 | 0.0204        | 0.0453 | -1.1241      |
| N-H <sup>...</sup> F                            | 0.0465    | -0.0357 | 0.0408 | -0.0050 | 0.0199        | 0.0458 | -1.1225      |
| N-H <sup>...</sup> F                            | 0.0443    | -0.0338 | 0.0386 | -0.0048 | 0.0207        | 0.0435 | -1.1269      |
| N-H <sup>...</sup> F                            | 0.0442    | -0.0337 | 0.0385 | -0.0048 | 0.0215        | 0.0433 | -1.1247      |
| C-H <sup>...</sup> F                            | 0.0058    | -0.0062 | 0.0048 | 0.0014  | 0.1974        | 0.0034 | -0.7083      |
| C-H <sup>...</sup> F                            | 0.0073    | -0.0076 | 0.0062 | 0.0014  | 0.0939        | 0.0048 | -0.7742      |
| C-H <sup>...</sup> F                            | 0.0054    | -0.0056 | 0.0042 | 0.0013  | 0.0625        | 0.0029 | -0.6905      |
| O <sup>...</sup> Cs                             | 0.0199    | -0.0172 | 0.0160 | 0.0011  | 0.1329        | 0.0149 | -0.9313      |
| O <sup>...</sup> Cs                             | 0.0149    | -0.1219 | 0.0114 | 0.0008  | 0.0795        | 0.0106 | -0.9298      |
| O <sup>...</sup> Cs                             | 0.0163    | -0.0136 | 0.0126 | 0.0009  | 0.0847        | 0.0117 | -0.9286      |
| O <sup>...</sup> Cs                             | 0.0149    | -0.0122 | 0.0114 | 0.0008  | 0.0789        | 0.0106 | -0.9298      |
| O <sup>...</sup> Cs                             | 0.0201    | -0.0175 | 0.0163 | 0.0011  | 0.1338        | 0.0152 | -0.9325      |
| C <sub><math>\pi</math></sub> <sup>...</sup> Cs | 0.0094    | -0.0075 | 0.0062 | 0.0013  | 3.1113        | 0.0049 | -0.7903      |
| C <sub><math>\pi</math></sub> <sup>...</sup> Cs | 0.0093    | -0.0076 | 0.0062 | 0.0013  | 2.8472        | 0.0049 | -0.7903      |

Table S6.

Topological properties of Receptor-Cs<sup>+</sup>Cl<sup>-</sup> (C/P) computed at BP86/B2 level.  $\rho(r)$  in units of  $e\text{\AA}^{-3}$ ,  $L(r)$  in units of  $e\text{\AA}^{-3}$ ,  $G(r)$ ,  $V(r)$ ,  $H(r)$  in units of a.u.  $\text{\AA}^{-3}$ .

| Receptor-Cs <sup>+</sup> Cl <sup>-</sup> (C/P) |           |         |        |         |               |        |              |
|------------------------------------------------|-----------|---------|--------|---------|---------------|--------|--------------|
| BCP                                            | $\rho(r)$ | $L(r)$  | $G(r)$ | $H(r)$  | $\varepsilon$ | $V(r)$ | $-V(r)/G(r)$ |
| N-H <sup>⋯</sup> Cl                            | 0.0277    | -0.0189 | 0.0202 | -0.0014 | 0.0129        | 0.0216 | -1.0693      |
| N-H <sup>⋯</sup> Cl                            | 0.0282    | -0.0191 | 0.0206 | -0.0015 | 0.0135        | 0.0221 | -1.0728      |
| N-H <sup>⋯</sup> Cl                            | 0.0269    | -0.0184 | 0.0194 | -0.0011 | 0.0142        | 0.0206 | -1.0619      |
| N-H <sup>⋯</sup> Cl                            | 0.0269    | -0.0185 | 0.0197 | -0.0012 | 0.0149        | 0.0209 | -1.0609      |
| C-H <sup>⋯</sup> Cl                            | 0.0094    | -0.0076 | 0.0062 | 0.0013  | 0.0081        | 0.0049 | -0.7903      |
| C-H <sup>⋯</sup> Cl                            | 0.0090    | -0.0072 | 0.0059 | 0.0013  | 0.0135        | 0.0046 | -0.7797      |
| C-H <sup>⋯</sup> Cl                            | 0.0095    | -0.0077 | 0.0064 | 0.0013  | 0.0137        | 0.0050 | -0.7813      |
| C <sub><math>\pi</math></sub> <sup>⋯</sup> Cl  | 0.0039    | -0.0028 | 0.0023 | 0.0005  | 0.8139        | 0.0018 | -0.7826      |
| C <sub><math>\pi</math></sub> <sup>⋯</sup> Cl  | 0.0042    | -0.0030 | 0.0025 | 0.0005  | 0.1235        | 0.0019 | -0.7600      |
| O <sup>⋯</sup> Cs                              | 0.0189    | -0.0164 | 0.0152 | 0.0011  | 0.1349        | 0.0141 | -0.9276      |
| O <sup>⋯</sup> Cs                              | 0.0141    | -0.0115 | 0.0107 | 0.0008  | 0.0713        | 0.0099 | -0.9252      |
| O <sup>⋯</sup> Cs                              | 0.0154    | -0.0128 | 0.0118 | 0.0009  | 0.0904        | 0.0109 | -0.9237      |
| O <sup>⋯</sup> Cs                              | 0.0141    | -0.0115 | 0.0107 | 0.0008  | 0.0724        | 0.0099 | -0.9252      |
| O <sup>⋯</sup> Cs                              | 0.0191    | -0.0163 | 0.0152 | 0.0011  | 0.1329        | 0.0141 | -0.9276      |
| C <sub><math>\pi</math></sub> <sup>⋯</sup> Cs  | 0.0093    | -0.0076 | 0.0062 | 0.0013  | 5.4798        | 0.0049 | -0.7903      |
| C <sub><math>\pi</math></sub> <sup>⋯</sup> Cs  | 0.0091    | -0.0074 | 0.0061 | 0.0013  | 2.2582        | 0.0047 | -0.7705      |

Table S7.

Topological properties of Receptor-Cs<sup>+</sup>Br<sup>-</sup> (G/P) computed at BP86/B2 level.  $\rho(r)$  in units of eÅ<sup>-3</sup>, L(r) in units of eÅ<sup>-3</sup>, G(r), V(r), H(r) in units of a.u. Å<sup>-3</sup>.

| Receptor-Cs <sup>+</sup> Br <sup>-</sup> (G/P) |           |         |        |        |            |        |            |
|------------------------------------------------|-----------|---------|--------|--------|------------|--------|------------|
| BCP                                            | $\rho(r)$ | L(r)    | G(r)   | H(r)   | $\epsilon$ | V(r)   | -V(r)/G(r) |
| N-H <sup>⋯</sup> Br                            | 0.0190    | -0.0127 | 0.0124 | 0.0003 | 0.0275     | 0.0120 | -0.9677    |
| N-H <sup>⋯</sup> Br                            | 0.0192    | -0.0128 | 0.0125 | 0.0003 | 0.0269     | 0.0122 | -0.9760    |
| N-H <sup>⋯</sup> Br                            | 0.0182    | -0.0123 | 0.0119 | 0.0004 | 0.0302     | 0.0114 | -0.9580    |
| N-H <sup>⋯</sup> Br                            | 0.0180    | -0.0121 | 0.0117 | 0.0004 | 0.0310     | 0.0112 | -0.9573    |
| C-H <sup>⋯</sup> Br                            | 0.0095    | -0.0067 | 0.0056 | 0.0010 | 0.0211     | 0.0046 | -0.8214    |
| C-H <sup>⋯</sup> Br                            | 0.0091    | -0.0064 | 0.0054 | 0.0010 | 0.0234     | 0.0043 | -0.7963    |
| C-H <sup>⋯</sup> Br                            | 0.0033    | -0.0023 | 0.0018 | 0.0005 | 0.6375     | 0.0013 | -0.7222    |
| C <sub><math>\pi</math></sub> <sup>⋯</sup> Br  | 0.0043    | -0.0029 | 0.0024 | 0.0005 | 1.3654     | 0.0019 | -0.7917    |
| C <sub><math>\pi</math></sub> <sup>⋯</sup> Br  | 0.0042    | -0.0028 | 0.0023 | 0.0005 | 1.3723     | 0.0019 | -0.8261    |
| Cs <sup>⋯</sup> Br                             | 0.0060    | -0.0040 | 0.0033 | 0.0007 | 0.0015     | 0.0025 | -0.7576    |
| C-H <sup>⋯</sup> Cs                            | 0.0032    | -0.0029 | 0.0021 | 0.0008 | 0.2691     | 0.0014 | -0.6667    |
| C-H <sup>⋯</sup> Cs                            | 0.0032    | -0.0029 | 0.0021 | 0.0008 | 0.3960     | 0.0014 | -0.6667    |
| O <sup>⋯</sup> Cs                              | 0.0079    | -0.0071 | 0.0061 | 0.0010 | 0.1100     | 0.0051 | -0.8361    |
| O <sup>⋯</sup> Cs                              | 0.0089    | -0.0079 | 0.0069 | 0.0010 | 0.1152     | 0.0059 | -0.8551    |
| C <sub><math>\pi</math></sub> <sup>⋯</sup> Cs  | 0.0067    | -0.0049 | 0.0040 | 0.0009 | 0.6206     | 0.0030 | -0.7500    |
| C <sub><math>\pi</math></sub> <sup>⋯</sup> Cs  | 0.0089    | -0.0071 | 0.0058 | 0.0013 | 2.4049     | 0.0045 | -0.7759    |



Table S8.

Topological properties of Receptor-Cs<sup>+</sup>I (G/P) computed at BP86/B2 level.  $\rho(r)$  in units of  $e\text{\AA}^{-3}$ ,  $L(r)$  in units of  $e\text{\AA}^{-3}$ ,  $G(r)$ ,  $V(r)$ ,  $H(r)$  in units of a.u.  $\text{\AA}^{-3}$ .

| Receptor-Cs <sup>+</sup> I (G/P)              |           |         |        |         |               |        |              |
|-----------------------------------------------|-----------|---------|--------|---------|---------------|--------|--------------|
| BCP                                           | $\rho(r)$ | $L(r)$  | $G(r)$ | $H(r)$  | $\varepsilon$ | $V(r)$ | $-V(r)/G(r)$ |
| N-H <sup>⋯</sup> I                            | 0.0162    | -0.0094 | 0.0095 | -0.0001 | 0.0149        | 0.0095 | -1.0000      |
| N-H <sup>⋯</sup> I                            | 0.0162    | -0.0095 | 0.0095 | -0.0001 | 0.0152        | 0.0095 | -1.0000      |
| N-H <sup>⋯</sup> I                            | 0.0148    | -0.0089 | 0.0087 | 0.0002  | 0.0197        | 0.0085 | -0.9770      |
| N-H <sup>⋯</sup> I                            | 0.0147    | -0.0089 | 0.0086 | 0.0002  | 0.0188        | 0.0084 | -0.9767      |
| C-H <sup>⋯</sup> I                            | 0.0087    | -0.0057 | 0.0048 | 0.0009  | 0.0220        | 0.0039 | -0.8125      |
| C-H <sup>⋯</sup> I                            | 0.0093    | -0.0061 | 0.0052 | 0.0009  | 0.0199        | 0.0043 | -0.8269      |
| C-H <sup>⋯</sup> I                            | 0.0050    | -0.0034 | 0.0026 | 0.0007  | 0.4325        | 0.0019 | -0.7308      |
| C <sub><math>\pi</math></sub> <sup>⋯</sup> I  | 0.0051    | -0.0031 | 0.0026 | 0.0005  | 2.1084        | 0.0021 | -0.8077      |
| C <sub><math>\pi</math></sub> <sup>⋯</sup> I  | 0.0050    | -0.0030 | 0.0025 | 0.0005  | 1.8963        | 0.0020 | -0.8000      |
| Cs <sup>⋯</sup> I                             | 0.0073    | -0.0047 | 0.0039 | 0.0008  | 0.0038        | 0.0030 | -0.7692      |
| C-H <sup>⋯</sup> Cs                           | 0.0031    | -0.0029 | 0.0021 | 0.0008  | 0.7412        | 0.0013 | -0.6190      |
| O <sup>⋯</sup> Cs                             | 0.0022    | -0.0023 | 0.0017 | 0.0006  | 0.3557        | 0.0011 | -0.6471      |
| O <sup>⋯</sup> Cs                             | 0.0109    | -0.0094 | 0.0084 | 0.0010  | 0.1234        | 0.0074 | -0.8810      |
| O <sup>⋯</sup> Cs                             | 0.0118    | -0.0101 | 0.0091 | 0.0010  | 0.1270        | 0.0081 | -0.8901      |
| C <sub><math>\pi</math></sub> <sup>⋯</sup> Cs | 0.0076    | -0.0057 | 0.0047 | 0.0011  | 1.0105        | 0.0036 | -0.7660      |
| C <sub><math>\pi</math></sub> <sup>⋯</sup> Cs | 0.0082    | -0.0067 | 0.0054 | 0.0013  | 8.2469        | 0.0042 | -0.7778      |

Table S9.

Topological properties of Receptor-Cs<sup>+</sup>NO<sub>3</sub><sup>-</sup> (G/P) computed at BP86/B2 level.  $\rho(r)$  in units of eÅ<sup>-3</sup>, L(r) in units of eÅ<sup>-3</sup>, G(r), V(r), H(r) in units of a.u. Å<sup>-3</sup>.

| Receptor-Cs <sup>+</sup> NO <sub>3</sub> <sup>-</sup> (G/P) |           |         |        |         |               |        |            |
|-------------------------------------------------------------|-----------|---------|--------|---------|---------------|--------|------------|
| BCP                                                         | $\rho(r)$ | L(r)    | G(r)   | H(r)    | $\varepsilon$ | V(r)   | -V(r)/G(r) |
| N-H <sup>⋯</sup> O                                          | 0.0282    | -0.0217 | 0.0227 | -0.0009 | 0.0592        | 0.0237 | -1.0441    |
| N-H <sup>⋯</sup> O                                          | 0.0283    | -0.0219 | 0.0229 | -0.0009 | 0.0604        | 0.0238 | -1.0393    |
| N-H <sup>⋯</sup> O                                          | 0.0258    | -0.0199 | 0.0208 | -0.0009 | 0.0631        | 0.0216 | -1.0385    |
| N-H <sup>⋯</sup> O                                          | 0.0259    | -0.0200 | 0.0209 | -0.0009 | 0.0639        | 0.0217 | -1.0383    |
| C-H <sup>⋯</sup> O                                          | 0.0041    | -0.0041 | 0.0031 | 0.0009  | 1.3171        | 0.0021 | -0.6774    |
| C <sub><math>\pi</math></sub> <sup>⋯</sup> O                | 0.0036    | -0.0034 | 0.0027 | 0.0007  | 4.3269        | 0.0019 | -0.7037    |
| C <sub><math>\pi</math></sub> <sup>⋯</sup> O                | 0.0036    | -0.0034 | 0.0027 | 0.0007  | 4.2951        | 0.0019 | -0.7037    |
| C-H <sup>⋯</sup> O                                          | 0.0086    | -0.0070 | 0.0063 | 0.0008  | 0.0047        | 0.0055 | -0.8730    |
| C <sub><math>\pi</math></sub> <sup>⋯</sup> O                | 0.0029    | -0.0027 | 0.0021 | 0.0006  | 0.3554        | 0.0016 | -0.7619    |
| C <sub><math>\pi</math></sub> <sup>⋯</sup> O                | 0.0029    | -0.0028 | 0.0022 | 0.0006  | 0.4010        | 0.0016 | -0.7273    |
| Cs <sup>⋯</sup> O                                           | 0.0101    | -0.0084 | 0.0075 | 0.0009  | 0.0105        | 0.0065 | -0.8667    |
| C-H <sup>⋯</sup> O                                          | 0.0066    | -0.0057 | 0.0048 | 0.0009  | 0.0224        | 0.0039 | -0.8125    |
| C-H <sup>⋯</sup> O                                          | 0.0029    | -0.0028 | 0.0022 | 0.0006  | 1.2024        | 0.0016 | -0.7273    |
| C <sub><math>\pi</math></sub> <sup>⋯</sup> O                | 0.0033    | -0.0030 | 0.0024 | 0.0006  | 0.5377        | 0.0018 | -0.7500    |
| C <sub><math>\pi</math></sub> <sup>⋯</sup> O                | 0.0032    | -0.0029 | 0.0024 | 0.0006  | 0.4289        | 0.0018 | -0.7500    |
| Cs <sup>⋯</sup> O                                           | 0.0102    | -0.0086 | 0.0076 | 0.0009  | 0.0219        | 0.0066 | -0.8684    |
| O <sup>⋯</sup> Cs                                           | 0.0047    | -0.0047 | 0.0038 | 0.0009  | 0.0936        | 0.0028 | -0.7368    |
| O <sup>⋯</sup> Cs                                           | 0.0096    | -0.0085 | 0.0074 | 0.0009  | 0.1138        | 0.0065 | -0.8784    |
| O <sup>⋯</sup> Cs                                           | 0.0102    | -0.0089 | 0.0079 | 0.0009  | 0.1169        | 0.0069 | -0.8734    |
| O <sup>⋯</sup> Cs                                           | 0.0050    | -0.0049 | 0.0040 | 0.0009  | 0.0662        | 0.0031 | -0.7750    |
| C <sub><math>\pi</math></sub> <sup>⋯</sup> Cs               | 0.0059    | -0.0044 | 0.0036 | 0.0009  | 0.7242        | 0.0027 | -0.7500    |
| C <sub><math>\pi</math></sub> <sup>⋯</sup> Cs               | 0.0084    | -0.0068 | 0.0055 | 0.0013  | 3.0972        | 0.0042 | -0.7636    |

Figure S1: Optimized structures of hydrated ion systems.

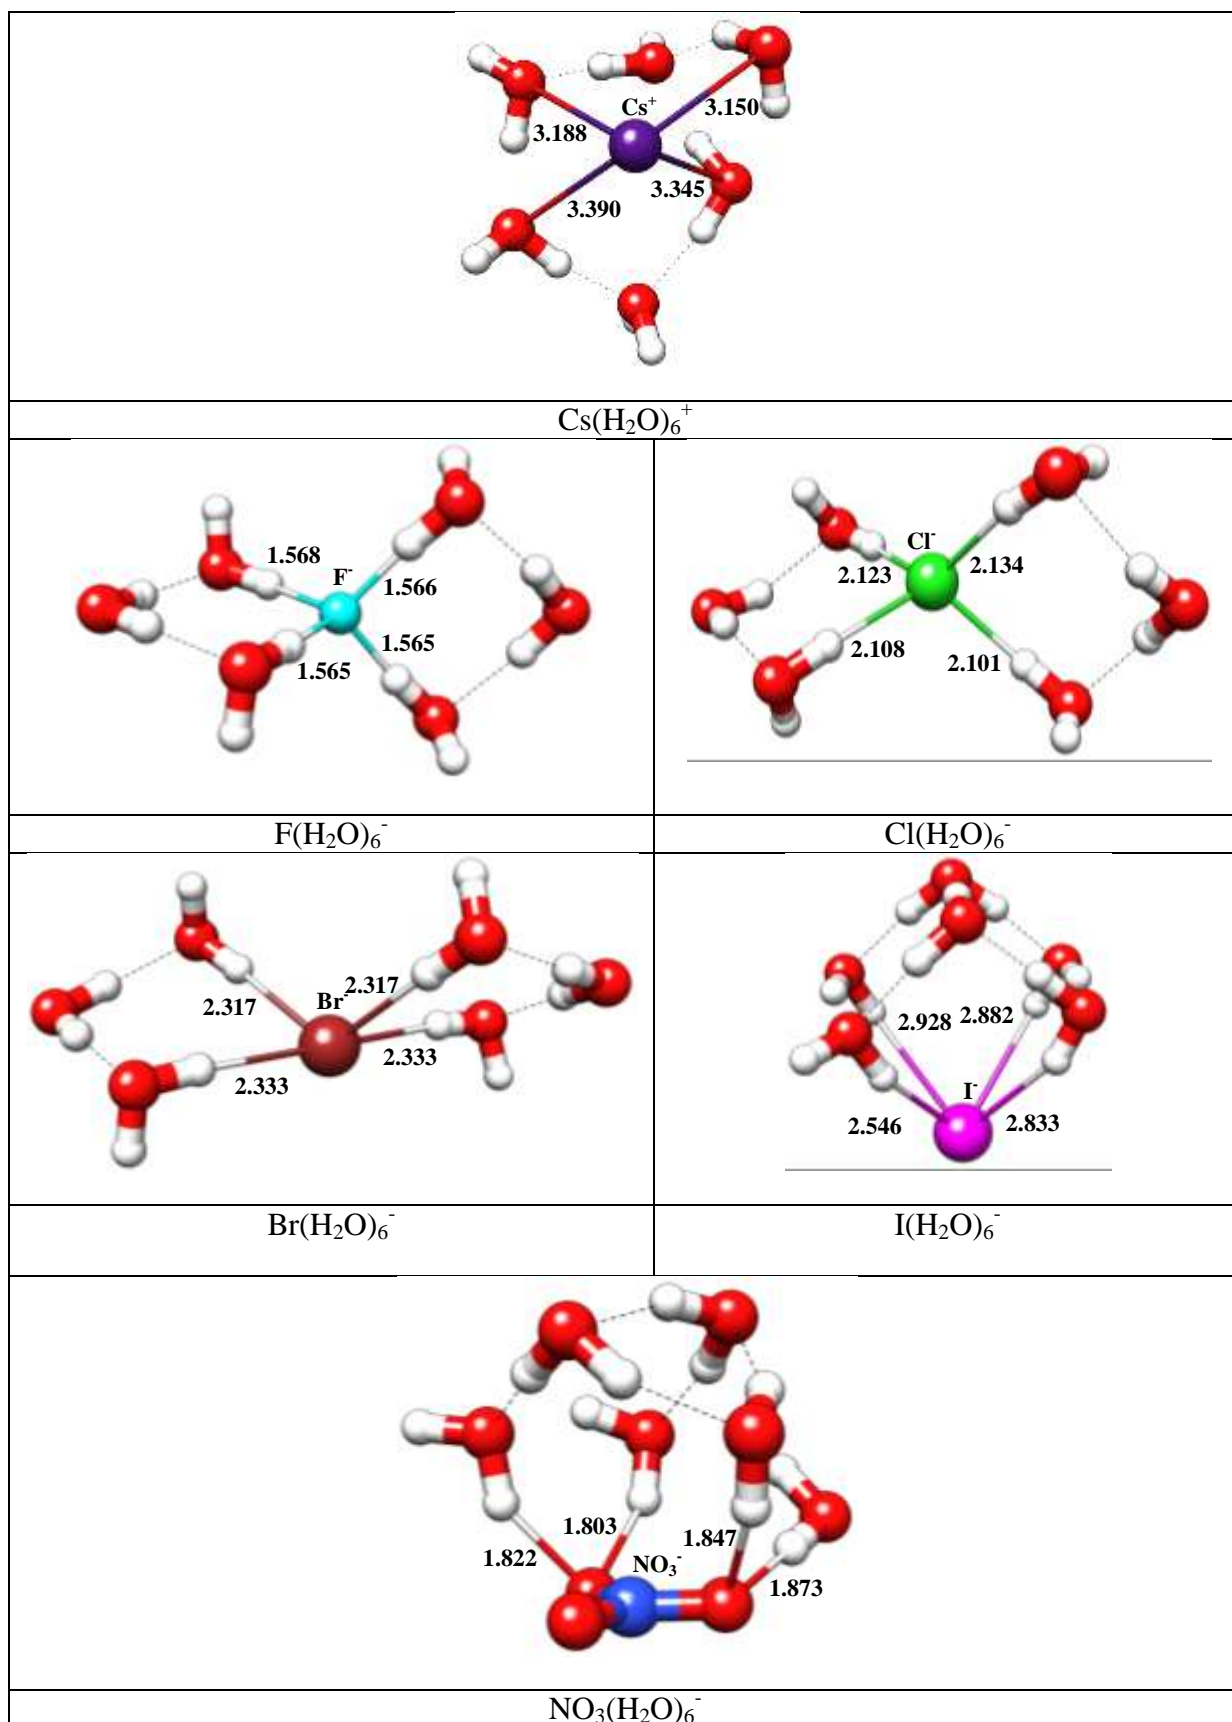

Figure S2: Superimposition of optimized structures (red) and crystal structures (blue) of Receptor- $\text{Cs}^+\text{Cl}^-\text{H}_2\text{O}$  complex.

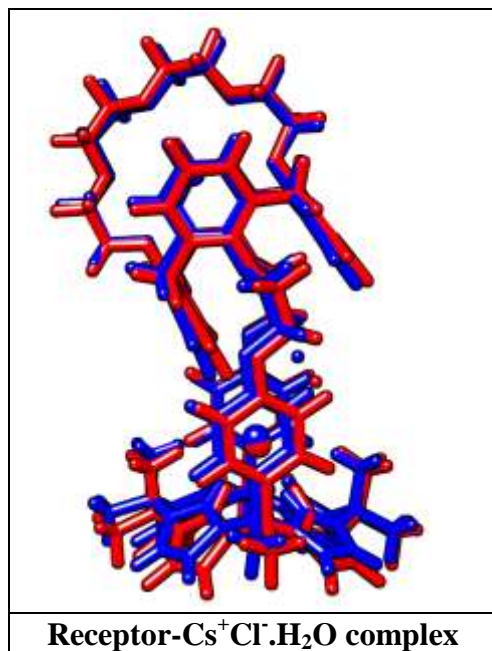

Figure S3: Molecular graphs of the titled cases computed at BP86/B2 showing bond paths, bond critical points in red (BCPs) and ring critical points (RCPs) in yellow.

(a) Receptor-Cs<sup>+</sup>F<sup>-</sup> (C/P)

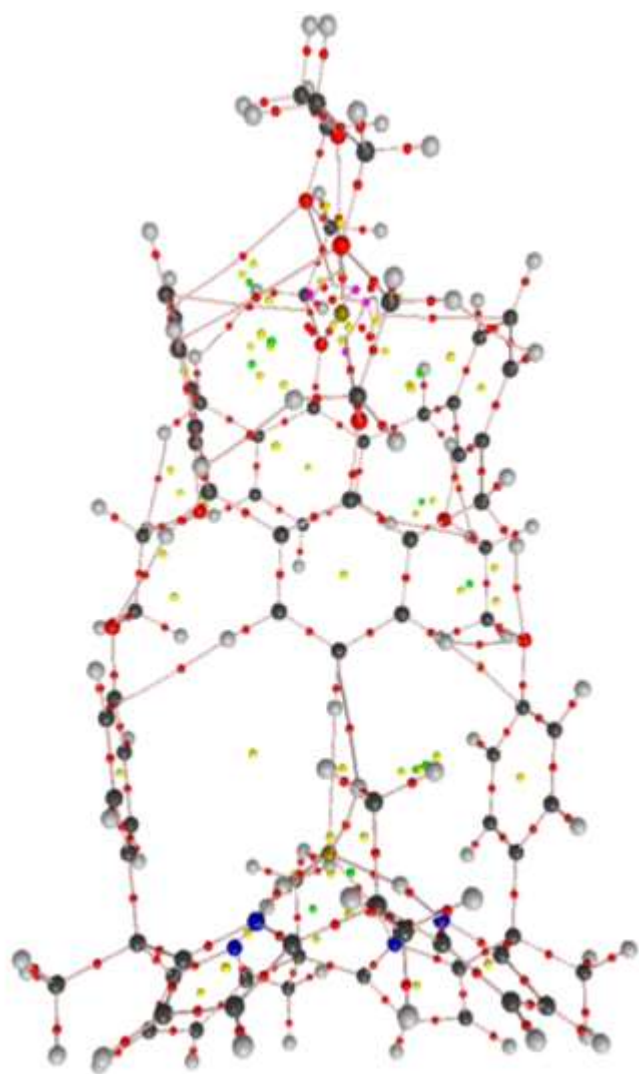

(b) Receptor-Cs<sup>+</sup>Cl<sup>-</sup> (C/P)

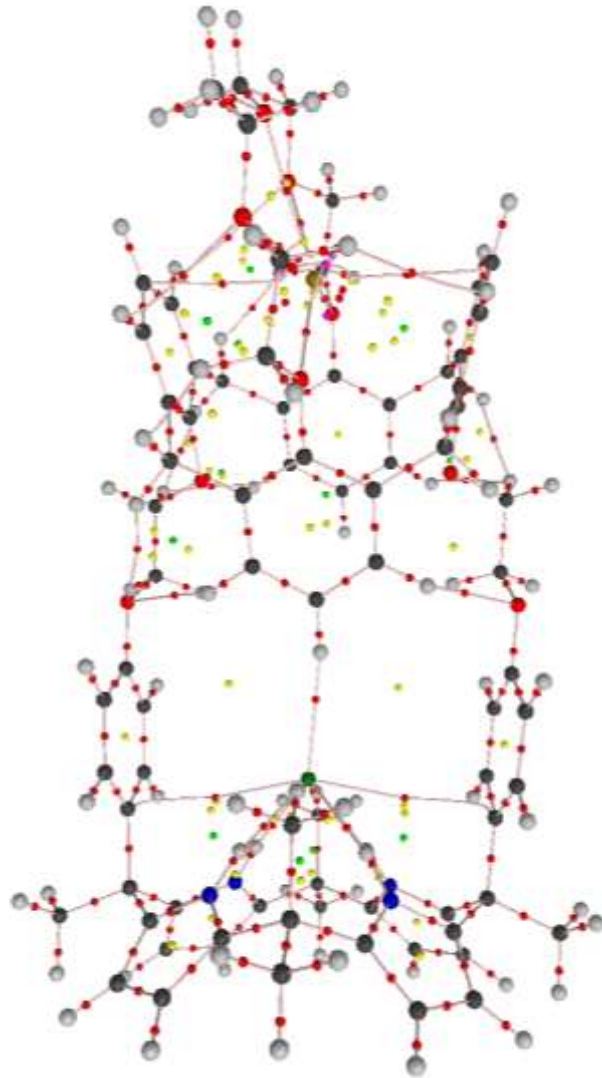

(c) Receptor-Cs<sup>+</sup>Br<sup>-</sup> (G/P)

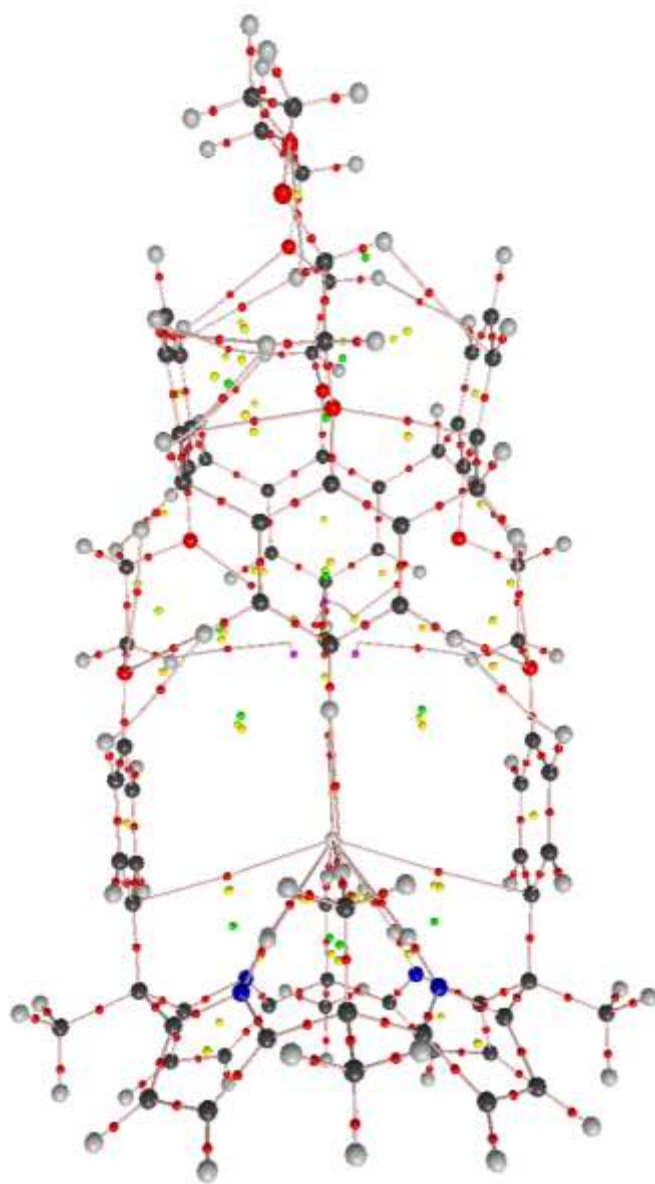

(d) Receptor-Cs<sup>+</sup>I (G/P)

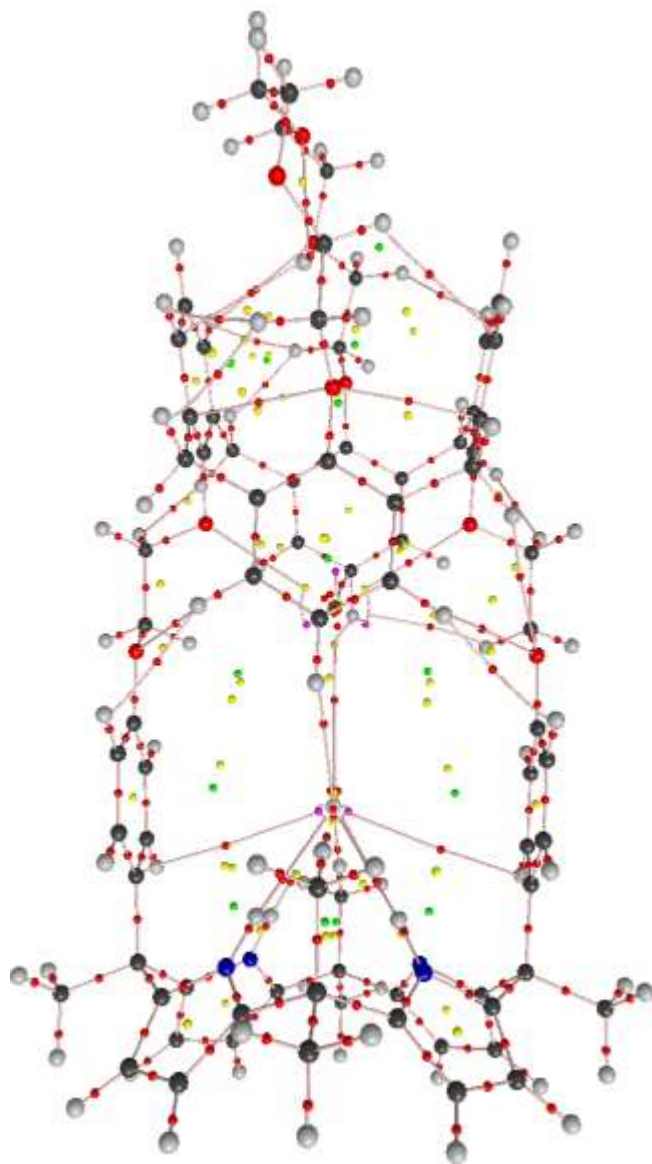



(e) Receptor-Cs<sup>+</sup>NO<sub>3</sub><sup>-</sup> (G/P)

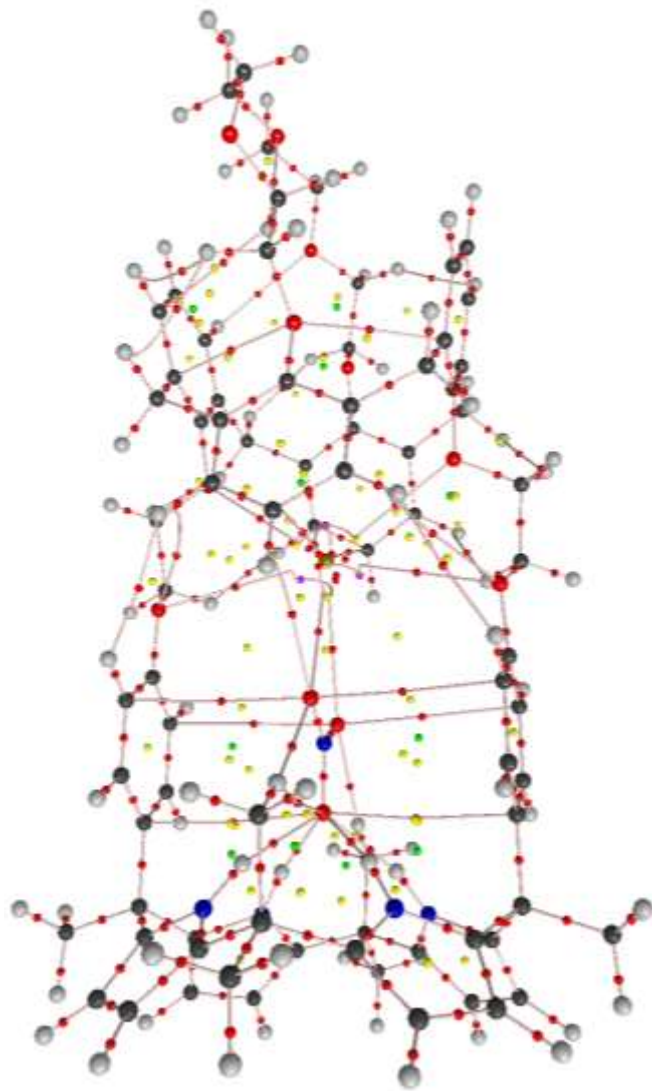

## **Optimized Structure coordinates:**

### **1) Receptor-Cs<sup>+</sup> (Crown site) [Energy (Hartree) : -3936.849915740366]**

|    |            |            |            |
|----|------------|------------|------------|
| Cs | 0.9023330  | 5.4452106  | 2.7732953  |
| O  | -3.5902218 | -0.4255788 | 1.6608515  |
| O  | -2.5351146 | 2.3487418  | 1.4530523  |
| O  | -0.6120311 | 6.5625864  | 0.5262862  |
| O  | -0.2575712 | 8.3102001  | 2.7644337  |
| O  | 1.4589080  | 7.4069516  | 5.0142076  |
| O  | 2.0492408  | 4.5463923  | 5.5196184  |
| O  | 1.7785864  | 2.7155739  | 3.3583916  |
| O  | 2.0056910  | 3.1480606  | -1.2116164 |
| O  | 3.1352131  | 0.7190334  | -2.6460775 |
| N  | -0.0057549 | -4.9658805 | -4.3450789 |
| H  | -0.1311678 | -4.9073128 | -3.3324532 |
| N  | -2.7459580 | -5.2895972 | -2.3230310 |
| H  | -2.6016150 | -4.3025636 | -2.0950949 |
| N  | -0.6921592 | -5.9853446 | 0.2684742  |
| H  | -0.5931670 | -5.2500553 | -0.4321969 |
| N  | 2.1018472  | -5.2939553 | -1.7099417 |
| H  | 2.0100666  | -4.3028564 | -1.4708625 |
| C  | 1.2304292  | -5.0486815 | -4.9653914 |
| C  | 0.9811397  | -5.2790939 | -6.3188096 |
| H  | 1.7403005  | -5.3845923 | -7.1038524 |
| C  | -0.4404397 | -5.3295036 | -6.5000145 |
| H  | -0.9690238 | -5.4810654 | -7.4493747 |
| C  | -1.0381843 | -5.1275818 | -5.2539261 |
| C  | -2.4993481 | -4.9446515 | -4.8519329 |
| C  | -2.8544981 | -5.7788021 | -3.6227575 |
| C  | -3.3796012 | -7.0669156 | -3.5155458 |
| H  | -3.5813813 | -7.7485229 | -4.3518506 |
| C  | -3.6255244 | -7.3319502 | -2.1312309 |
| H  | -4.0296045 | -8.2625022 | -1.7123514 |
| C  | -3.2475660 | -6.2042342 | -1.4021122 |
| C  | -3.2225671 | -5.9732611 | 0.1107941  |
| C  | -1.9073714 | -6.5219921 | 0.6585261  |
| C  | -1.6185526 | -7.5246382 | 1.5849646  |
| H  | -2.3541476 | -8.1518317 | 2.1037827  |
| C  | -0.1934449 | -7.5741815 | 1.7465302  |
| H  | 0.3627312  | -8.2488371 | 2.4091427  |
| C  | 0.3653965  | -6.5989597 | 0.9179131  |
| C  | 1.8062565  | -6.1489577 | 0.6926890  |
| C  | 2.1856418  | -6.3234493 | -0.7778152 |
| C  | 2.6346763  | -7.4480918 | -1.4716691 |
| H  | 2.7880131  | -8.4470153 | -1.0427887 |
| C  | 2.8559597  | -7.0701955 | -2.8337296 |
| H  | 3.2007036  | -7.7279466 | -3.6422858 |
| C  | 2.5384998  | -5.7178921 | -2.9607275 |
| C  | 2.5232406  | -4.8109493 | -4.1932496 |

|   |            |            |            |
|---|------------|------------|------------|
| C | -3.4066429 | -5.3702078 | -6.0289999 |
| H | -3.2361479 | -6.4298558 | -6.3151203 |
| H | -3.2064283 | -4.7391738 | -6.9216390 |
| H | -4.4757853 | -5.2498372 | -5.7515060 |
| C | -2.7479479 | -3.4346894 | -4.5650602 |
| H | -3.8009970 | -3.2529846 | -4.2535382 |
| H | -2.5461867 | -2.8394322 | -5.4813894 |
| H | -2.0709483 | -3.0374537 | -3.7749173 |
| C | -4.4038955 | -6.7392058 | 0.7620008  |
| H | -5.3682953 | -6.3645274 | 0.3586211  |
| H | -4.3993230 | -6.5862033 | 1.8621301  |
| H | -4.3391471 | -7.8304727 | 0.5639659  |
| C | 1.9549874  | -4.6647774 | 1.1289813  |
| H | 2.9930408  | -4.3001740 | 0.9620138  |
| H | 1.7203906  | -4.5644600 | 2.2103657  |
| H | 1.2555205  | -3.9853012 | 0.5905277  |
| C | 2.7506832  | -7.0056327 | 1.5661599  |
| H | 2.6765896  | -8.0846437 | 1.3141313  |
| H | 2.4974868  | -6.8874729 | 2.6421799  |
| H | 3.8043187  | -6.6857606 | 1.4164637  |
| C | 3.7275433  | -5.1655964 | -5.1062524 |
| H | 4.6820037  | -5.0278118 | -4.5557967 |
| H | 3.7421167  | -4.5057116 | -5.9996897 |
| H | 3.6708230  | -6.2195868 | -5.4530515 |
| C | -3.3600805 | -4.4728315 | 0.4847577  |
| C | -4.1419407 | -3.5661230 | -0.2626216 |
| H | -4.6974444 | -3.9136110 | -1.1495183 |
| C | -4.2470264 | -2.2046021 | 0.0890337  |
| H | -4.8466047 | -1.5344544 | -0.5447058 |
| C | -3.5918236 | -1.7273679 | 1.2434158  |
| C | -2.8702825 | -2.6393664 | 2.0471963  |
| H | -2.3869443 | -2.2765599 | 2.9683467  |
| C | -2.7518035 | -3.9782018 | 1.6634980  |
| H | -2.1651108 | -4.6617865 | 2.2983487  |
| C | -4.0786336 | 0.5868085  | 0.7748930  |
| H | -5.1642315 | 0.4338309  | 0.5737137  |
| H | -3.5298532 | 0.5464810  | -0.1946467 |
| C | -3.9171235 | 1.9465714  | 1.4261057  |
| H | -4.5289889 | 2.6719884  | 0.8418833  |
| H | -4.3248001 | 1.9119565  | 2.4625078  |
| C | -2.2477345 | 3.2883140  | 2.4242123  |
| C | -2.6666605 | 4.6418007  | 2.2797629  |
| C | -2.5517196 | 5.4891968  | 3.4042830  |
| H | -2.9080494 | 6.5299881  | 3.3274217  |
| C | -1.9870084 | 5.0340822  | 4.6068801  |
| H | -1.9325673 | 5.7032518  | 5.4811981  |
| C | -1.4403970 | 3.7412930  | 4.6713322  |
| H | -0.9323185 | 3.4059209  | 5.5906436  |
| C | -1.5357069 | 2.8550375  | 3.5774205  |
| C | -0.9307161 | 1.4562083  | 3.6602800  |

|   |            |            |            |
|---|------------|------------|------------|
| H | -1.7490658 | 0.7082160  | 3.5773280  |
| H | -0.5005411 | 1.3332074  | 4.6776976  |
| C | 0.1009950  | 1.1067833  | 2.5844349  |
| C | 1.3659768  | 1.7432192  | 2.4518440  |
| C | 2.2103302  | 1.4911210  | 1.3372305  |
| C | 1.8220962  | 0.4961970  | 0.4195087  |
| H | 2.4683922  | 0.3014714  | -0.4496201 |
| C | 0.6209106  | -0.2052474 | 0.5781282  |
| H | 0.3296277  | -0.9783459 | -0.1518465 |
| C | -0.2382324 | 0.1222787  | 1.6343529  |
| H | -1.2212196 | -0.3642866 | 1.7171370  |
| C | 3.5002292  | 2.2711972  | 1.0845602  |
| H | 4.0505728  | 1.7449157  | 0.2732868  |
| H | 4.1543725  | 2.2359246  | 1.9825186  |
| C | 3.3313434  | 3.7404093  | 0.6977904  |
| C | 2.5126325  | 4.1393308  | -0.3966228 |
| C | 2.2163757  | 5.5117063  | -0.6396966 |
| C | 2.9342149  | 6.4770732  | 0.1017865  |
| H | 2.7544716  | 7.5463073  | -0.1036772 |
| C | 3.8620125  | 6.1037512  | 1.0884848  |
| H | 4.4280260  | 6.8743787  | 1.6373133  |
| C | 4.0184382  | 4.7449384  | 1.4122157  |
| H | 4.6968299  | 4.4491434  | 2.2306745  |
| C | 1.1640739  | 5.9800303  | -1.6493522 |
| H | 1.0939456  | 7.0850351  | -1.5548242 |
| H | 1.5209158  | 5.7924219  | -2.6866520 |
| C | -0.2293944 | 5.3664036  | -1.5210929 |
| C | -1.0857945 | 5.6673494  | -0.4274347 |
| C | -2.3431346 | 5.0232441  | -0.2647479 |
| C | -2.7737351 | 4.1601496  | -1.2937742 |
| H | -3.7600528 | 3.6751259  | -1.2033634 |
| C | -1.9794472 | 3.9076956  | -2.4208911 |
| H | -2.3436859 | 3.2371071  | -3.2163848 |
| C | -0.7081792 | 4.4904423  | -2.5159534 |
| H | -0.0731519 | 4.2744106  | -3.3911774 |
| C | -3.2265091 | 5.2012764  | 0.9711193  |
| H | -3.4492758 | 6.2762423  | 1.1406603  |
| H | -4.2110342 | 4.7351759  | 0.7460499  |
| C | 2.2542764  | 2.2984477  | 4.6495324  |
| H | 2.9824683  | 1.4624674  | 4.5389558  |
| H | 1.4104762  | 1.9449168  | 5.2852473  |
| C | 2.9574024  | 3.4665234  | 5.3240195  |
| H | 3.3596689  | 3.1050390  | 6.3029150  |
| H | 3.8272600  | 3.7998961  | 4.7040040  |
| C | 2.6224301  | 5.6510337  | 6.2180438  |
| H | 3.5598597  | 5.9915664  | 5.7107623  |
| H | 2.8926324  | 5.3495191  | 7.2600758  |
| C | 1.6351395  | 6.8051798  | 6.2969015  |
| H | 0.6561427  | 6.4395471  | 6.6955723  |
| H | 2.0361856  | 7.5563325  | 7.0210922  |

|   |            |            |            |
|---|------------|------------|------------|
| C | 0.5785737  | 8.5306945  | 5.0315830  |
| H | 0.9633579  | 9.3080696  | 5.7366704  |
| H | -0.4379826 | 8.2265288  | 5.3853300  |
| C | 0.4779246  | 9.1562549  | 3.6487799  |
| H | -0.0331857 | 10.1453998 | 3.7478956  |
| H | 1.5046970  | 9.3448331  | 3.2462556  |
| C | -0.2894421 | 8.7860892  | 1.4221173  |
| H | 0.7467244  | 8.8302477  | 1.0022186  |
| H | -0.7144119 | 9.8195698  | 1.3792630  |
| C | -1.1658258 | 7.8915894  | 0.5585396  |
| H | -2.2032420 | 7.8756824  | 0.9633725  |
| H | -1.1993700 | 8.3170444  | -0.4703622 |
| C | 2.6227962  | 3.0710008  | -2.5087978 |
| H | 3.7284092  | 3.1786854  | -2.4185762 |
| H | 2.2534134  | 3.8875362  | -3.1700556 |
| C | 2.2880676  | 1.7480330  | -3.1707312 |
| H | 1.2156710  | 1.5024687  | -2.9940511 |
| H | 2.4537315  | 1.8435515  | -4.2688222 |
| C | 2.9434816  | -0.5650659 | -3.0739017 |
| C | 3.8054710  | -1.5460844 | -2.5293130 |
| H | 4.5933418  | -1.2337671 | -1.8251077 |
| C | 3.6588679  | -2.8925834 | -2.8860312 |
| H | 4.3532827  | -3.6300849 | -2.4490138 |
| C | 2.6479588  | -3.3173450 | -3.7852040 |
| C | 1.8176584  | -2.3212641 | -4.3353148 |
| H | 1.0381218  | -2.6014222 | -5.0609595 |
| C | 1.9531759  | -0.9620048 | -3.9958246 |
| H | 1.2734137  | -0.2300886 | -4.4554980 |

**2) Receptor-Cs<sup>+</sup> (Glycol site) [Energy (Hartree) : -3936.846636768254]**

|    |            |            |            |
|----|------------|------------|------------|
| Cs | -0.2333533 | 0.0514101  | -1.1606845 |
| O  | 2.6116134  | -2.0407404 | -0.6471166 |
| O  | 1.9789405  | -0.6849901 | -3.1903791 |
| O  | -0.8660382 | 1.0556598  | -6.2043362 |
| O  | -0.8216167 | 3.1644607  | -8.2637806 |
| O  | 1.0456859  | 5.4727783  | -7.9722796 |
| O  | 2.3159454  | 6.3990674  | -5.3331548 |
| O  | 1.6872258  | 3.4431603  | -3.3937807 |
| O  | -2.1520909 | 2.2763130  | -2.0312207 |
| O  | -2.5169701 | 1.5859622  | 0.7365355  |
| N  | 1.9973062  | -2.5174401 | 5.6193986  |
| H  | 1.8224806  | -2.0003321 | 4.7539615  |
| N  | -0.2753535 | -4.9178382 | 4.5313414  |
| H  | -0.3933291 | -3.9045818 | 4.4775006  |
| N  | -2.7913111 | -2.8815457 | 5.1384576  |
| H  | -2.5828076 | -2.5559941 | 4.1903731  |
| N  | -0.4976649 | -0.6799806 | 6.5885379  |
| H  | -0.3549824 | -1.4431335 | 5.9236109  |
| C  | 2.2131908  | -1.9224810 | 6.8612337  |
| C  | 2.7030808  | -2.9253047 | 7.6981468  |

|   |            |            |           |
|---|------------|------------|-----------|
| H | 2.9694749  | -2.8037851 | 8.7556296 |
| C | 2.8150657  | -4.1276799 | 6.9311500 |
| H | 3.1628124  | -5.1006680 | 7.3013994 |
| C | 2.3923232  | -3.8508397 | 5.6305252 |
| C | 2.2585474  | -4.7871026 | 4.4248926 |
| C | 0.9507518  | -5.5610941 | 4.5530382 |
| C | 0.6822306  | -6.9235819 | 4.6908066 |
| H | 1.4299918  | -7.7248013 | 4.7406033 |
| C | -0.7414056 | -7.0857659 | 4.7478409 |
| H | -1.2834340 | -8.0347438 | 4.8444729 |
| C | -1.3206555 | -5.8192728 | 4.6395986 |
| C | -2.7766349 | -5.3713618 | 4.5349867 |
| C | -3.0511805 | -4.2055556 | 5.4809700 |
| C | -3.5657879 | -4.1839484 | 6.7782849 |
| H | -3.8626300 | -5.0628412 | 7.3647343 |
| C | -3.6422187 | -2.8200165 | 7.2022577 |
| H | -3.9935694 | -2.4619331 | 8.1788430 |
| C | -3.1730818 | -2.0197283 | 6.1600126 |
| C | -2.9794674 | -0.5017672 | 6.1011928 |
| C | -1.7331579 | -0.1356351 | 6.8976727 |
| C | -1.5166191 | 0.7840240  | 7.9242110 |
| H | -2.2837135 | 1.4036880  | 8.4050786 |
| C | -0.1140404 | 0.7856130  | 8.2221265 |
| H | 0.3892804  | 1.4097107  | 8.9712190 |
| C | 0.5053675  | -0.1316445 | 7.3696292 |
| C | 1.9796400  | -0.4365558 | 7.1141269 |
| C | 3.4427100  | -5.7923535 | 4.4376714 |
| H | 4.4065694  | -5.2465352 | 4.3587401 |
| H | 3.3621030  | -6.4915826 | 3.5782494 |
| H | 3.4547784  | -6.3912757 | 5.3730467 |
| C | -3.6997096 | -6.5535686 | 4.9038387 |
| H | -3.4974432 | -6.9267435 | 5.9303049 |
| H | -3.5479064 | -7.3982223 | 4.1978341 |
| H | -4.7646983 | -6.2415077 | 4.8478857 |
| C | -3.0743373 | -4.9556753 | 3.0645646 |
| H | -4.1257186 | -4.6075087 | 2.9543666 |
| H | -2.9180353 | -5.8243292 | 2.3889060 |
| H | -2.3975606 | -4.1468893 | 2.7077812 |
| C | -4.2102826 | 0.1953625  | 6.7427645 |
| H | -5.1362848 | -0.0798697 | 6.1953660 |
| H | -4.0940437 | 1.2995030  | 6.7012475 |
| H | -4.3300422 | -0.1029965 | 7.8061488 |
| C | 2.4484009  | 0.3902062  | 5.8784890 |
| H | 3.5166968  | 0.1852087  | 5.6428326 |
| H | 2.3332390  | 1.4762103  | 6.0846882 |
| H | 1.8391236  | 0.1708325  | 4.9725302 |
| C | 2.8111975  | 0.0075112  | 8.3381176 |
| H | 2.4845759  | -0.5111252 | 9.2645248 |
| H | 2.7034267  | 1.1010036  | 8.5027884 |
| H | 3.8878464  | -0.2117463 | 8.1725363 |

|   |            |            |            |
|---|------------|------------|------------|
| C | 2.3101650  | -4.0256945 | 3.0735302  |
| C | 3.2036516  | -2.9481821 | 2.8559808  |
| H | 3.8709573  | -2.6096834 | 3.6659207  |
| C | 3.2871837  | -2.3022839 | 1.6135317  |
| H | 3.9883127  | -1.4661353 | 1.4611582  |
| C | 2.4916173  | -2.7372054 | 0.5315611  |
| C | 1.6287716  | -3.8373498 | 0.7119218  |
| H | 1.0091689  | -4.2185798 | -0.1138716 |
| C | 1.5428210  | -4.4568249 | 1.9713308  |
| H | 0.8594507  | -5.3129920 | 2.0867808  |
| C | 2.2522283  | -2.7067038 | -1.8636037 |
| H | 1.1478406  | -2.8532620 | -1.9313225 |
| H | 2.7298015  | -3.7126153 | -1.9009685 |
| C | 2.7445757  | -1.8976701 | -3.0461565 |
| H | 3.8241033  | -1.6550082 | -2.9150200 |
| H | 2.6426464  | -2.5273169 | -3.9595024 |
| C | 3.7626820  | 1.5341091  | -2.6432945 |
| H | 4.5762796  | 2.2875571  | -2.7519802 |
| H | 4.2329350  | 0.6648484  | -2.1327923 |
| C | 2.4012439  | 0.0877568  | -4.2779004 |
| C | 3.3221105  | 1.1378629  | -4.0449813 |
| C | 3.8539623  | 1.8085326  | -5.1645554 |
| H | 4.6007160  | 2.6045755  | -5.0034358 |
| C | 3.4454107  | 1.4834956  | -6.4656967 |
| H | 3.8755238  | 2.0142584  | -7.3307147 |
| C | 2.4541593  | 0.5107932  | -6.6586603 |
| H | 2.0970638  | 0.2863545  | -7.6775624 |
| C | 1.9023124  | -0.1992466 | -5.5730352 |
| C | 0.8095811  | -1.2354002 | -5.8243443 |
| H | 1.1809806  | -2.2560597 | -5.5813648 |
| H | 0.6086845  | -1.2433964 | -6.9181476 |
| C | -0.5005815 | -1.0305212 | -5.0721553 |
| C | -0.9747726 | -2.0217442 | -4.1871387 |
| H | -0.3904048 | -2.9490384 | -4.0589562 |
| C | -2.1860928 | -1.8575344 | -3.4941620 |
| H | -2.5569835 | -2.6521858 | -2.8253882 |
| C | -2.9127700 | -0.6644549 | -3.6456104 |
| H | -3.8496138 | -0.5192585 | -3.0806985 |
| C | -2.4769223 | 0.3570087  | -4.5173103 |
| C | -1.2913288 | 0.1341926  | -5.2714787 |
| C | -3.2797490 | 1.6502444  | -4.6243717 |
| H | -3.7188587 | 1.7426052  | -5.6420053 |
| H | -4.1486151 | 1.5609779  | -3.9359750 |
| C | -2.5073039 | 2.9331754  | -4.3369820 |
| C | -1.9180853 | 3.1816100  | -3.0727561 |
| C | -1.1013910 | 4.3145642  | -2.8353584 |
| C | -1.0119944 | 5.2804718  | -3.8587184 |
| H | -0.4117406 | 6.1898331  | -3.6879051 |
| C | -1.6492365 | 5.0936815  | -5.0928137 |
| H | -1.5568047 | 5.8566981  | -5.8823978 |

|   |            |            |             |
|---|------------|------------|-------------|
| C | -2.3595277 | 3.9113693  | -5.3394016  |
| H | -2.7966207 | 3.7357109  | -6.3347792  |
| C | -0.3537161 | 4.5257813  | -1.5252569  |
| H | -1.0711293 | 4.5304754  | -0.6754786  |
| H | 0.0743990  | 5.5540835  | -1.5487705  |
| C | 0.7611047  | 3.5431795  | -1.1531977  |
| C | 1.7269433  | 3.0470336  | -2.0775308  |
| C | 2.7150579  | 2.0999630  | -1.6823254  |
| C | 2.7764952  | 1.7282328  | -0.3212962  |
| H | 3.5492259  | 1.0106053  | 0.0014005   |
| C | 1.8839812  | 2.2650355  | 0.6207250   |
| H | 1.9624022  | 1.9807659  | 1.6831391   |
| C | 0.8767058  | 3.1476712  | 0.1981276   |
| H | 0.1550693  | 3.5474714  | 0.9301244   |
| C | -1.5473865 | 0.9935448  | -7.4688350  |
| H | -2.5851299 | 1.3921295  | -7.3798176  |
| H | -1.6189292 | -0.0664305 | -7.8092640  |
| C | -0.7932733 | 1.7761953  | -8.5275503  |
| H | 0.2621848  | 1.4096357  | -8.5872658  |
| H | -1.2802161 | 1.5476206  | -9.5121485  |
| C | -0.2146865 | 3.9172137  | -9.3009494  |
| H | -0.8418531 | 3.8829389  | -10.2297579 |
| H | 0.7888482  | 3.4948584  | -9.5608520  |
| C | -0.0344093 | 5.3660261  | -8.8825602  |
| H | 0.1677840  | 5.9771820  | -9.8001234  |
| H | -0.9842923 | 5.7501563  | -8.4302954  |
| C | 1.3260954  | 6.8052580  | -7.5823419  |
| H | 0.4496895  | 7.2647943  | -7.0558980  |
| H | 1.5420234  | 7.4404757  | -8.4822680  |
| C | 2.5454056  | 6.8378523  | -6.6634152  |
| H | 3.3686851  | 6.2448646  | -7.1376492  |
| H | 2.8845505  | 7.8932877  | -6.5766069  |
| C | 2.1325589  | 4.9942976  | -5.1705827  |
| H | 2.8793442  | 4.4285123  | -5.7766969  |
| H | 1.1227419  | 4.6655387  | -5.5038853  |
| C | 2.2996808  | 4.7065803  | -3.6788211  |
| H | 3.3758947  | 4.6896398  | -3.3833894  |
| H | 1.8070898  | 5.5243069  | -3.1021361  |
| C | -3.3381651 | 2.5944121  | -1.2763446  |
| H | -4.2264681 | 2.6268938  | -1.9484829  |
| H | -3.2292282 | 3.5966293  | -0.8015913  |
| C | -3.5921830 | 1.5478480  | -0.2090478  |
| H | -4.5567027 | 1.7933625  | 0.2906977   |
| H | -3.6819292 | 0.5307240  | -0.6584273  |
| C | -2.6942189 | 1.0419812  | 1.9835660   |
| C | -1.7614233 | 1.4362660  | 2.9647490   |
| H | -0.9787373 | 2.1630044  | 2.6956285   |
| C | -1.8437086 | 0.9262728  | 4.2652000   |
| H | -1.1135986 | 1.2729397  | 5.0120795   |
| C | -2.8508203 | 0.0066414  | 4.6390746   |



|   |            |            |           |
|---|------------|------------|-----------|
| C | -3.7877712 | -0.3616749 | 3.6474868 |
| H | -4.6087951 | -1.0555726 | 3.8953819 |
| C | -3.7189442 | 0.1369837  | 2.3314248 |
| H | -4.4662334 | -0.1904994 | 1.5927211 |

**3) Receptor-Cs<sup>+</sup> (Pyrrole site) [Energy (Hartree) : -3936.836604488540]**

|   |            |            |            |
|---|------------|------------|------------|
| O | -3.4417343 | 2.7193191  | -0.0134779 |
| O | -2.5364465 | 1.8429813  | -2.7557321 |
| O | -1.1952566 | -0.9767063 | -6.0818343 |
| O | 0.1535918  | -0.6552596 | -8.7982839 |
| O | 2.5806990  | 1.9460451  | -8.1222415 |
| O | 4.1505001  | 2.9910771  | -5.8567431 |
| O | 1.8605666  | 2.3626704  | -3.8424517 |
| O | 1.2544260  | -1.7787873 | -2.2519885 |
| O | 3.5054802  | -2.4423118 | -0.2627606 |
| N | -2.8182296 | -0.8982833 | 5.1916868  |
| H | -2.4727237 | -0.7240161 | 4.2449818  |
| N | 0.0434188  | -3.0026016 | 5.1383032  |
| H | 0.0454901  | -2.4276164 | 4.2934107  |
| N | 2.1069355  | -0.3308691 | 5.5217408  |
| H | 1.8730235  | -0.2725056 | 4.5279199  |
| N | -0.7669096 | 1.7919125  | 5.6512869  |
| H | -0.6809793 | 1.4898210  | 4.6787880  |
| C | -3.0357788 | -2.1641606 | 5.7241618  |
| C | -3.7815726 | -1.9771091 | 6.8907347  |
| H | -4.1186248 | -2.7679140 | 7.5729357  |
| C | -4.0374554 | -0.5743165 | 7.0327056  |
| H | -4.5964778 | -0.0989342 | 7.8484505  |
| C | -3.4448014 | 0.0821745  | 5.9523725  |
| C | -3.3111420 | 1.5740999  | 5.6369080  |
| C | -1.9943501 | 2.0571766  | 6.2478303  |
| C | -1.7174608 | 2.7103880  | 7.4491182  |
| H | -2.4581101 | 3.0486770  | 8.1843325  |
| C | -0.2954281 | 2.8624393  | 7.5506436  |
| H | 0.2458539  | 3.3428797  | 8.3752403  |
| C | 0.2816271  | 2.3022589  | 6.4089595  |
| C | 1.7440564  | 2.1639888  | 5.9833131  |
| C | 2.2526837  | 0.7706045  | 6.3575527  |
| C | 2.8641745  | 0.3013964  | 7.5228301  |
| H | 3.1143195  | 0.9032576  | 8.4057785  |
| C | 3.1139829  | -1.1001933 | 7.3586577  |
| H | 3.5824709  | -1.7638727 | 8.0962189  |
| C | 2.6517715  | -1.4737814 | 6.0953919  |
| C | 2.5760582  | -2.8444338 | 5.4187823  |
| C | 1.2115642  | -3.4526417 | 5.7443919  |
| C | 0.8300250  | -4.4301706 | 6.6629753  |
| H | 1.5020774  | -4.9837938 | 7.3301884  |
| C | -0.5928919 | -4.5852286 | 6.5764586  |
| H | -1.2042123 | -5.2826015 | 7.1625276  |
| C | -1.0655091 | -3.7018404 | 5.6042767  |

|   |            |            |            |
|---|------------|------------|------------|
| C | -2.4783958 | -3.4362514 | 5.0833702  |
| C | -4.4880579 | 2.3399003  | 6.2959835  |
| H | -4.5089010 | 2.1910181  | 7.3965009  |
| H | -5.4532742 | 1.9833929  | 5.8784386  |
| H | -4.3940426 | 3.4279873  | 6.0947822  |
| C | -2.4654467 | -3.3078731 | 3.5370365  |
| H | -1.8161318 | -2.4813048 | 3.1654573  |
| H | -3.4914572 | -3.1195751 | 3.1526446  |
| H | -2.0867899 | -4.2458758 | 3.0771120  |
| C | -3.3872641 | -4.6278219 | 5.4622833  |
| H | -2.9992736 | -5.5660725 | 5.0105471  |
| H | -4.4194396 | -4.4536032 | 5.0895173  |
| H | -3.4408379 | -4.7744763 | 6.5613980  |
| C | 3.6892494  | -3.7565764 | 5.9971537  |
| H | 3.5893972  | -3.8762095 | 7.0969266  |
| H | 4.6871132  | -3.3185630 | 5.7840422  |
| H | 3.6366152  | -4.7634559 | 5.5318051  |
| C | 2.5883007  | 3.2242566  | 6.7272605  |
| H | 2.5277671  | 3.1028201  | 7.8290140  |
| H | 2.2299400  | 4.2455972  | 6.4755251  |
| H | 3.6560453  | 3.1381299  | 6.4318465  |
| C | 1.8924362  | 2.4121444  | 4.4593526  |
| H | 2.9562101  | 2.3192091  | 4.1508835  |
| H | 1.5418614  | 3.4338879  | 4.1989707  |
| H | 1.3054819  | 1.6997318  | 3.8333493  |
| C | -3.3501431 | 1.8435471  | 4.1122487  |
| C | -4.1287112 | 1.0542761  | 3.2390189  |
| H | -4.7142247 | 0.2083859  | 3.6355574  |
| C | -4.1987178 | 1.3144700  | 1.8574149  |
| H | -4.8157603 | 0.6597529  | 1.2251152  |
| C | -3.4835443 | 2.4023256  | 1.3099599  |
| C | -2.7477648 | 3.2409868  | 2.1802801  |
| H | -2.2236285 | 4.1156521  | 1.7631891  |
| C | -2.6874347 | 2.9628668  | 3.5503563  |
| H | -2.1120792 | 3.6434513  | 4.1991434  |
| C | -4.1347605 | 1.8816259  | -0.9466530 |
| H | -5.2330202 | 1.9557384  | -0.7716060 |
| H | -3.8224531 | 0.8198885  | -0.8201378 |
| C | -3.8242618 | 2.3294458  | -2.3627250 |
| H | -4.6227505 | 1.9295146  | -3.0308917 |
| H | -3.8625846 | 3.4432664  | -2.4246151 |
| C | -2.1205350 | 2.2778906  | -4.0040938 |
| C | -2.6310842 | 1.6799077  | -5.1858799 |
| C | -2.2750432 | 2.2583826  | -6.4212788 |
| H | -2.6905500 | 1.8271140  | -7.3477375 |
| C | -1.4023217 | 3.3540458  | -6.4938690 |
| H | -1.1464160 | 3.7958716  | -7.4711152 |
| C | -0.8189214 | 3.8507874  | -5.3187604 |
| H | -0.0936637 | 4.6804966  | -5.3716845 |
| C | -1.1553799 | 3.3153341  | -4.0602919 |

|   |            |            |            |
|---|------------|------------|------------|
| C | -0.5025469 | 3.8411807  | -2.7900676 |
| H | 0.1227778  | 4.7193297  | -3.0656429 |
| H | -1.2853925 | 4.2290147  | -2.1019060 |
| C | 0.3171804  | 2.8179149  | -2.0048723 |
| C | 1.4287779  | 2.1190999  | -2.5516656 |
| C | 2.0831196  | 1.0954147  | -1.8182487 |
| C | 1.6599595  | 0.8289108  | -0.5018161 |
| H | 2.1669556  | 0.0316792  | 0.0660321  |
| C | 0.6036492  | 1.5477792  | 0.0734276  |
| H | 0.2751038  | 1.3290018  | 1.1037037  |
| C | -0.0706496 | 2.5153097  | -0.6842395 |
| H | -0.9507254 | 3.0273526  | -0.2644234 |
| C | 3.2104775  | 0.2774607  | -2.4354284 |
| H | 3.6328211  | -0.3665127 | -1.6332027 |
| H | 4.0263333  | 0.9535801  | -2.7736620 |
| C | 2.8139297  | -0.5912050 | -3.6229228 |
| C | 1.8139658  | -1.5916624 | -3.5036674 |
| C | 1.3491577  | -2.3058440 | -4.6426898 |
| C | 2.0422101  | -2.1270461 | -5.8573327 |
| H | 1.7117158  | -2.6884449 | -6.7477880 |
| C | 3.1053261  | -1.2194017 | -5.9651644 |
| H | 3.6369275  | -1.1052594 | -6.9237589 |
| C | 3.4490430  | -0.4192254 | -4.8670745 |
| H | 4.2061242  | 0.3746657  | -4.9742325 |
| C | 0.1112022  | -3.1985995 | -4.6219903 |
| H | 0.2632962  | -4.0808725 | -3.9616098 |
| H | -0.0073882 | -3.6208590 | -5.6435250 |
| C | -1.1819336 | -2.5153459 | -4.1833643 |
| C | -1.7604543 | -1.4350182 | -4.9039364 |
| C | -2.9199498 | -0.7688763 | -4.4257087 |
| C | -3.5366446 | -1.2504498 | -3.2540150 |
| H | -4.4540969 | -0.7566040 | -2.8911918 |
| C | -3.0140037 | -2.3499220 | -2.5581815 |
| H | -3.5148866 | -2.7220285 | -1.6488467 |
| C | -1.8369745 | -2.9600685 | -3.0161230 |
| H | -1.4089863 | -3.8091788 | -2.4564456 |
| C | -3.5078400 | 0.4301781  | -5.1624874 |
| H | -4.4986153 | 0.6545189  | -4.7069915 |
| H | -3.7179896 | 0.1543472  | -6.2190448 |
| C | 2.6439403  | 3.5462963  | -4.0328528 |
| H | 3.5888338  | 3.4957570  | -3.4386089 |
| H | 2.0817323  | 4.4452043  | -3.6883255 |
| C | 2.9749812  | 3.7188444  | -5.5068314 |
| H | 2.1026753  | 3.3862761  | -6.1139395 |
| H | 3.1442760  | 4.8087960  | -5.7017703 |
| C | 4.5058970  | 3.1100950  | -7.2306353 |
| H | 5.6185782  | 3.1012762  | -7.2866738 |
| H | 4.1557135  | 4.0886002  | -7.6411536 |
| C | 3.9974297  | 1.9652880  | -8.1008094 |
| H | 4.4214211  | 2.0910217  | -9.1323585 |

|    |            |            |            |
|----|------------|------------|------------|
| H  | 4.3898708  | 0.9987487  | -7.6972932 |
| C  | 2.0213749  | 0.8257450  | -8.7908014 |
| H  | 2.6897076  | -0.0644181 | -8.7023787 |
| H  | 1.8898941  | 1.0324699  | -9.8839216 |
| C  | 0.6773302  | 0.4991591  | -8.1426386 |
| H  | 0.8202616  | 0.3248038  | -7.0526599 |
| H  | -0.0213687 | 1.3633774  | -8.2582827 |
| C  | -1.2074933 | -0.9458122 | -8.5231611 |
| H  | -1.5717920 | -1.5624395 | -9.3760309 |
| H  | -1.8101015 | -0.0052110 | -8.4974874 |
| C  | -1.4659448 | -1.7563242 | -7.2553317 |
| H  | -2.5347245 | -2.0811272 | -7.2615704 |
| H  | -0.8321714 | -2.6746693 | -7.2769480 |
| C  | 1.4729982  | -3.0288812 | -1.5974904 |
| H  | 1.1171627  | -3.8866635 | -2.2145567 |
| H  | 0.8373708  | -2.9867492 | -0.6889042 |
| C  | 2.9299184  | -3.3270797 | -1.2356622 |
| H  | 3.0146094  | -4.3842999 | -0.8956478 |
| H  | 3.5735233  | -3.2129483 | -2.1330210 |
| C  | 3.2413158  | -2.6111569 | 1.0655403  |
| C  | 2.4037834  | -3.6079936 | 1.6118709  |
| H  | 1.9040862  | -4.3527213 | 0.9757070  |
| C  | 2.1888101  | -3.6581579 | 3.0009955  |
| H  | 1.5356667  | -4.4538927 | 3.3949676  |
| C  | 2.7850330  | -2.7365279 | 3.8875522  |
| C  | 3.6634174  | -1.7781037 | 3.3247499  |
| H  | 4.2013734  | -1.0712542 | 3.9778384  |
| C  | 3.8828682  | -1.7064463 | 1.9435896  |
| H  | 4.5652644  | -0.9505107 | 1.5233186  |
| Cs | -0.5102944 | -0.9413728 | 8.1088514  |

**Receptor-Cs<sup>+</sup>F<sup>-</sup>.CH<sub>3</sub>OH (C/P) Energy (Hartree): -4152.624407254656**

|    |            |            |            |
|----|------------|------------|------------|
| Cs | 17.4741961 | 12.5498916 | 9.6164993  |
| O  | 13.8133769 | 6.9204049  | 13.0832159 |
| O  | 14.4614451 | 9.6339757  | 11.9206079 |
| O  | 16.7525362 | 13.6055257 | 12.2583002 |
| O  | 17.5508870 | 15.5573606 | 10.3117954 |
| O  | 17.9145121 | 14.6892694 | 7.5057082  |
| O  | 18.4712152 | 11.8709631 | 6.7530651  |
| O  | 17.7361531 | 9.8216274  | 8.5943620  |
| O  | 19.5411715 | 9.9956531  | 12.9131039 |
| O  | 20.9986649 | 10.1727198 | 15.6606237 |
| N  | 19.8455402 | 4.2785925  | 18.2173797 |
| H  | 19.0603542 | 4.8321350  | 17.8038904 |
| N  | 17.0534383 | 2.8593926  | 17.0707350 |
| H  | 17.2231062 | 3.8917709  | 17.1243478 |
| N  | 15.2711862 | 4.9137613  | 18.9158523 |
| H  | 16.0118180 | 5.2581870  | 18.2646515 |
| N  | 18.0586017 | 6.3603566  | 20.0335834 |
| H  | 17.8722117 | 6.1674574  | 19.0230605 |

|   |            |            |            |
|---|------------|------------|------------|
| C | 20.6612062 | 4.7267944  | 19.2422397 |
| C | 21.5152150 | 3.6706713  | 19.5777337 |
| H | 22.2996016 | 3.6931456  | 20.3449589 |
| C | 21.1978484 | 2.5695435  | 18.7219408 |
| H | 21.6976674 | 1.5923943  | 18.7090556 |
| C | 20.1570740 | 2.9728783  | 17.8761244 |
| C | 19.5125160 | 2.2497059  | 16.6922760 |
| C | 18.0426514 | 1.9003611  | 16.9317128 |
| C | 17.4078825 | 0.6526017  | 16.9565301 |
| H | 17.8986317 | -0.3237092 | 16.8584576 |
| C | 16.0038593 | 0.8824053  | 17.1076949 |
| H | 15.2215501 | 0.1146455  | 17.1538026 |
| C | 15.8065464 | 2.2659064  | 17.1751344 |
| C | 14.5166016 | 3.0696321  | 17.3349327 |
| C | 14.4890757 | 3.7980540  | 18.6797793 |
| C | 13.6833176 | 3.6149230  | 19.8079540 |
| H | 12.9299947 | 2.8284883  | 19.9440521 |
| C | 13.9941139 | 4.6626756  | 20.7344745 |
| H | 13.5240956 | 4.8262713  | 21.7125770 |
| C | 14.9818496 | 5.4653523  | 20.1510621 |
| C | 15.6093499 | 6.7765640  | 20.6238489 |
| C | 17.0858394 | 6.6210035  | 20.9835994 |
| C | 17.7419838 | 6.7794983  | 22.2093772 |
| H | 17.2658754 | 7.0080150  | 23.1713633 |
| C | 19.1443301 | 6.6152281  | 21.9746154 |
| H | 19.9424707 | 6.6928447  | 22.7238512 |
| C | 19.3165499 | 6.3574550  | 20.6109620 |
| C | 20.5894517 | 6.1516639  | 19.7924949 |
| C | 20.2910698 | 0.9402525  | 16.4349328 |
| H | 20.2388477 | 0.2510713  | 17.3048924 |
| H | 21.3610321 | 1.1617347  | 16.2335294 |
| H | 19.8742637 | 0.4108913  | 15.5513364 |
| C | 19.6374918 | 3.1370103  | 15.4174842 |
| H | 19.1164867 | 4.1137496  | 15.5084025 |
| H | 19.2032458 | 2.6057172  | 14.5411518 |
| H | 20.7102452 | 3.3475164  | 15.2062646 |
| C | 13.3164973 | 2.0893551  | 17.2750996 |
| H | 13.3716075 | 1.3307933  | 18.0856618 |
| H | 13.3042955 | 1.5579946  | 16.2999170 |
| H | 12.3615202 | 2.6455695  | 17.3824365 |
| C | 15.4690494 | 7.8448485  | 19.4983647 |
| H | 16.0121485 | 7.5496167  | 18.5745874 |
| H | 15.8848835 | 8.8187404  | 19.8406901 |
| H | 14.3976750 | 7.9877076  | 19.2336649 |
| C | 14.8419509 | 7.2767040  | 21.8661581 |
| H | 14.9107626 | 6.5579131  | 22.7106255 |
| H | 13.7670887 | 7.4195890  | 21.6231813 |
| H | 15.2549092 | 8.2496822  | 22.2095482 |
| C | 21.8133328 | 6.3864959  | 20.7163545 |
| H | 21.8151769 | 5.6813522  | 21.5752735 |

|   |            |            |            |
|---|------------|------------|------------|
| H | 21.7969373 | 7.4224249  | 21.1165549 |
| H | 22.7556520 | 6.2467065  | 20.1459059 |
| C | 14.3329585 | 4.1065884  | 16.1911335 |
| C | 14.9594457 | 3.9720804  | 14.9333355 |
| H | 15.6384007 | 3.1239692  | 14.7495084 |
| C | 14.7659025 | 4.9133034  | 13.9136469 |
| H | 15.2886256 | 4.8085172  | 12.9498510 |
| C | 13.9263657 | 6.0293419  | 14.1190806 |
| C | 13.2612391 | 6.1627922  | 15.3574569 |
| H | 12.5894302 | 7.0100533  | 15.5580867 |
| C | 13.4715218 | 5.2082897  | 16.3679341 |
| H | 12.9524675 | 5.3410281  | 17.3313412 |
| C | 13.1271970 | 8.1466354  | 13.3303248 |
| H | 13.5842173 | 8.6723053  | 14.2000082 |
| H | 12.0545387 | 7.9466436  | 13.5646729 |
| C | 13.1631857 | 9.0402368  | 12.1059458 |
| H | 12.8665292 | 8.4551802  | 11.2032923 |
| H | 12.4004050 | 9.8412142  | 12.2524039 |
| C | 14.4612644 | 10.5790327 | 10.9113802 |
| C | 14.6869691 | 10.1661361 | 9.5680847  |
| C | 14.4714042 | 11.1096714 | 8.5406576  |
| H | 14.5963682 | 10.7936389 | 7.4909794  |
| C | 14.0978192 | 12.4326432 | 8.8328077  |
| H | 13.9118330 | 13.1501442 | 8.0162756  |
| C | 14.0195893 | 12.8502315 | 10.1717752 |
| H | 13.7891476 | 13.9035837 | 10.4055234 |
| C | 14.2193205 | 11.9436262 | 11.2362806 |
| C | 14.1507685 | 12.4468894 | 12.6793052 |
| H | 13.9761837 | 13.5441341 | 12.6377440 |
| H | 13.2574427 | 12.0128159 | 13.1815248 |
| C | 15.3611475 | 12.1410554 | 13.5583458 |
| C | 16.6452602 | 12.6953063 | 13.3074090 |
| C | 17.7906444 | 12.2814073 | 14.0401015 |
| C | 17.5909137 | 11.3970439 | 15.1204080 |
| H | 18.4720634 | 11.0559620 | 15.6875642 |
| C | 16.3150438 | 10.9249629 | 15.4561534 |
| H | 16.1845992 | 10.2444881 | 16.3124734 |
| C | 15.2168117 | 11.2750446 | 14.6599358 |
| H | 14.2179442 | 10.8689589 | 14.8903012 |
| C | 19.2213925 | 12.7233456 | 13.7232032 |
| H | 19.8643786 | 12.3084017 | 14.5293444 |
| H | 19.3135866 | 13.8285856 | 13.8025426 |
| C | 19.8006867 | 12.3129092 | 12.3702710 |
| C | 19.8966580 | 10.9454301 | 11.9815024 |
| C | 20.3099648 | 10.5790631 | 10.6638669 |
| C | 20.8222898 | 11.6011651 | 9.8325662  |
| H | 21.1794486 | 11.3356716 | 8.8232407  |
| C | 20.8673940 | 12.9403327 | 10.2536559 |
| H | 21.2915249 | 13.7148450 | 9.5939160  |
| C | 20.3170304 | 13.2931023 | 11.4969321 |

|   |            |            |            |
|---|------------|------------|------------|
| H | 20.2931000 | 14.3519224 | 11.8045817 |
| C | 20.2209438 | 9.1545296  | 10.1027647 |
| H | 20.5080729 | 9.2122510  | 9.0315545  |
| H | 20.9968860 | 8.5093127  | 10.5728606 |
| C | 18.8764845 | 8.4483637  | 10.2717364 |
| C | 17.7008498 | 8.8230250  | 9.5647695  |
| C | 16.4319214 | 8.2766521  | 9.8934901  |
| C | 16.3715078 | 7.2813831  | 10.8897554 |
| H | 15.3892476 | 6.8805753  | 11.1846440 |
| C | 17.5296372 | 6.8301325  | 11.5365287 |
| H | 17.4705434 | 6.0817753  | 12.3440960 |
| C | 18.7640400 | 7.4148097  | 11.2233460 |
| H | 19.6677298 | 7.0877340  | 11.7626098 |
| C | 15.1444740 | 8.7490076  | 9.2197478  |
| H | 14.3445722 | 8.0220912  | 9.4838698  |
| H | 15.2528535 | 8.6983388  | 8.1147735  |
| C | 16.9332548 | 14.9946956 | 12.5854058 |
| H | 17.9741330 | 15.1845072 | 12.9342326 |
| H | 16.2333138 | 15.2897131 | 13.4006218 |
| C | 16.6360400 | 15.8507812 | 11.3639298 |
| H | 15.5848103 | 15.6792623 | 11.0215637 |
| H | 16.7206401 | 16.9225442 | 11.6714324 |
| C | 17.3687643 | 16.3782578 | 9.1585648  |
| H | 17.5837641 | 17.4463811 | 9.4081554  |
| H | 16.3099961 | 16.3203734 | 8.8012526  |
| C | 18.3092900 | 15.9515725 | 8.0420078  |
| H | 18.2770897 | 16.7348375 | 7.2447853  |
| H | 19.3589021 | 15.9028219 | 8.4262089  |
| C | 18.7229339 | 14.2607303 | 6.4101195  |
| H | 19.7892303 | 14.1488323 | 6.7295969  |
| H | 18.6931203 | 15.0217543 | 5.5916811  |
| C | 18.2102400 | 12.9438984 | 5.8478989  |
| H | 17.1130971 | 13.0249165 | 5.6448430  |
| H | 18.7220415 | 12.7568504 | 4.8718394  |
| C | 17.9169576 | 10.6292007 | 6.3276111  |
| H | 18.3107224 | 10.3454665 | 5.3200813  |
| H | 16.8044218 | 10.7122016 | 6.2438542  |
| C | 18.2844270 | 9.5185196  | 7.3004552  |
| H | 19.3926975 | 9.4146412  | 7.3548358  |
| H | 17.8632937 | 8.5603665  | 6.9188662  |
| C | 20.6081978 | 9.1721699  | 13.4182248 |
| H | 21.2195124 | 8.7621080  | 12.5832758 |
| H | 20.1059820 | 8.3237043  | 13.9278076 |
| C | 21.5578600 | 9.9003437  | 14.3717775 |
| H | 22.5017156 | 9.3179391  | 14.4701873 |
| H | 21.8323774 | 10.8925437 | 13.9546150 |
| C | 20.9338113 | 9.1607932  | 16.5882963 |
| C | 20.2868871 | 9.4717302  | 17.8054130 |
| H | 19.8797577 | 10.4858751 | 17.9482624 |
| C | 20.1617301 | 8.5029867  | 18.8095039 |

|   |            |           |            |
|---|------------|-----------|------------|
| H | 19.6448754 | 8.7696571 | 19.7461428 |
| C | 20.6750957 | 7.1957927 | 18.6457517 |
| C | 21.3397984 | 6.9120992 | 17.4382260 |
| H | 21.7649466 | 5.9093884 | 17.2729178 |
| C | 21.4682437 | 7.8673863 | 16.4141053 |
| H | 21.9773948 | 7.5733568 | 15.4847532 |
| F | 17.5215790 | 5.5145926 | 17.4612292 |
| O | 17.8477254 | 6.3464995 | 14.9656935 |
| C | 17.3923438 | 7.6797517 | 15.0194828 |
| H | 17.5515221 | 8.1556579 | 14.0276743 |
| H | 17.9399716 | 8.2910302 | 15.7835625 |
| H | 16.2966992 | 7.7546023 | 15.2502461 |
| H | 17.7073360 | 5.9745885 | 15.8855576 |

**Receptor-Cs<sup>+</sup>Cl<sup>-</sup>.H<sub>2</sub>O (C/P) Energy (Hartree): -4473.660432691813**

|    |            |            |            |
|----|------------|------------|------------|
| Cs | 0.9489870  | 5.5030539  | 2.8182374  |
| Cl | -0.3474365 | -3.2004411 | -1.4586870 |
| O  | -3.5552452 | -0.4130089 | 1.7706458  |
| O  | -2.4297270 | 2.3633067  | 1.5124284  |
| O  | -0.5646468 | 6.6085317  | 0.5683789  |
| O  | -0.2408878 | 8.3663966  | 2.7977611  |
| O  | 1.4641103  | 7.4841535  | 5.0648048  |
| O  | 2.0786604  | 4.6297211  | 5.5767449  |
| O  | 1.8511611  | 2.7872445  | 3.4131257  |
| O  | 2.0787529  | 3.2132818  | -1.1677202 |
| O  | 3.1858252  | 0.8041199  | -2.6318583 |
| N  | 0.0058740  | -4.7178498 | -4.2937973 |
| H  | -0.1205014 | -4.1455346 | -3.4338849 |
| N  | -2.6920004 | -5.2981051 | -2.3134455 |
| H  | -2.0237535 | -4.5481017 | -2.0444239 |
| N  | -0.6733423 | -5.9097152 | 0.2860450  |
| H  | -0.5794362 | -4.9836817 | -0.1781372 |
| N  | 2.0511550  | -5.3472595 | -1.7013158 |
| H  | 1.3958183  | -4.5506428 | -1.5752980 |
| C  | 1.2420234  | -5.0653915 | -4.8167357 |
| C  | 0.9969272  | -5.7832964 | -5.9916135 |
| H  | 1.7566356  | -6.2124189 | -6.6567040 |
| C  | -0.4199324 | -5.8547775 | -6.1706154 |
| H  | -0.9439507 | -6.3394665 | -7.0037275 |
| C  | -1.0212581 | -5.1774133 | -5.1035661 |
| C  | -2.4996275 | -4.8822511 | -4.8386708 |
| C  | -3.0370102 | -5.6281413 | -3.6148533 |
| C  | -3.9774421 | -6.6614167 | -3.5311770 |
| H  | -4.4690524 | -7.1553367 | -4.3785908 |
| C  | -4.2019438 | -6.9387350 | -2.1457644 |
| H  | -4.8913470 | -7.6880489 | -1.7368162 |
| C  | -3.3936685 | -6.0729624 | -1.4032983 |
| C  | -3.2267172 | -5.9300915 | 0.1109017  |
| C  | -1.8864845 | -6.5255544 | 0.5470048  |



|   |            |            |            |
|---|------------|------------|------------|
| C | -1.6003330 | -7.7170689 | 1.2204163  |
| H | -2.3351209 | -8.4493579 | 1.5779749  |
| C | -0.1794982 | -7.8022416 | 1.3670700  |
| H | 0.3742447  | -8.6094616 | 1.8628419  |
| C | 0.3801010  | -6.6600801 | 0.7830966  |
| C | 1.8381706  | -6.2018847 | 0.7052269  |
| C | 2.3845846  | -6.2689172 | -0.7228367 |
| C | 3.3020345  | -7.1542073 | -1.3011900 |
| H | 3.7808964  | -8.0044995 | -0.7992115 |
| C | 3.5211511  | -6.7364074 | -2.6524480 |
| H | 4.1950053  | -7.2096270 | -3.3778952 |
| C | 2.7327474  | -5.6037554 | -2.8781548 |
| C | 2.5673406  | -4.7344526 | -4.1280419 |
| C | -3.3128189 | -5.3274451 | -6.0754692 |
| H | -3.2081965 | -6.4159253 | -6.2707117 |
| H | -2.9675624 | -4.7815274 | -6.9795859 |
| H | -4.3914793 | -5.1074496 | -5.9249976 |
| C | -2.7136755 | -3.3516409 | -4.6574391 |
| H | -3.7995998 | -3.1314023 | -4.5493929 |
| H | -2.3337561 | -2.8059232 | -5.5503516 |
| H | -2.2062467 | -2.9326983 | -3.7621737 |
| C | -4.3671438 | -6.7153913 | 0.8114215  |
| H | -5.3540824 | -6.3046739 | 0.5104447  |
| H | -4.2695528 | -6.6266085 | 1.9141567  |
| H | -4.3426523 | -7.7937758 | 0.5456717  |
| C | 1.9622359  | -4.7502910 | 1.2514206  |
| H | 3.0248923  | -4.4205593 | 1.2260958  |
| H | 1.6043227  | -4.7074344 | 2.3043654  |
| H | 1.3661561  | -4.0202849 | 0.6616282  |
| C | 2.6923937  | -7.1257109 | 1.6020023  |
| H | 2.6445616  | -8.1849849 | 1.2711013  |
| H | 2.3350060  | -7.0793305 | 2.6533241  |
| H | 3.7567102  | -6.8067650 | 1.5782095  |
| C | 3.7233576  | -5.0595851 | -5.1114438 |
| H | 4.7025182  | -4.8355656 | -4.6379613 |
| H | 3.6265476  | -4.4435944 | -6.0305924 |
| H | 3.7183959  | -6.1302677 | -5.4074983 |
| C | -3.3513470 | -4.4482185 | 0.5497216  |
| C | -4.1609188 | -3.5387394 | -0.1576771 |
| H | -4.7124184 | -3.8791993 | -1.0493544 |
| C | -4.2787947 | -2.1895834 | 0.2298438  |
| H | -4.9319364 | -1.5202574 | -0.3507938 |
| C | -3.5713214 | -1.7184826 | 1.3584709  |
| C | -2.8209623 | -2.6377048 | 2.1237158  |
| H | -2.2962604 | -2.2819533 | 3.0248564  |
| C | -2.7174229 | -3.9744774 | 1.7204581  |
| H | -2.1030838 | -4.6634524 | 2.3226885  |
| C | -3.9679576 | 0.5903716  | 0.8306053  |
| H | -5.0490500 | 0.4660183  | 0.5870932  |
| H | -3.3718651 | 0.4884495  | -0.1066863 |

|   |            |            |            |
|---|------------|------------|------------|
| C | -3.8109984 | 1.9671805  | 1.4441255  |
| H | -4.3931706 | 2.6774007  | 0.8128823  |
| H | -4.2597526 | 1.9727203  | 2.4643511  |
| C | -2.1637034 | 3.3100032  | 2.4796597  |
| C | -2.5958765 | 4.6593182  | 2.3303431  |
| C | -2.4946847 | 5.5099327  | 3.4540905  |
| H | -2.8597698 | 6.5473911  | 3.3727983  |
| C | -1.9305422 | 5.0637303  | 4.6603623  |
| H | -1.8855771 | 5.7360339  | 5.5328523  |
| C | -1.3728106 | 3.7758438  | 4.7306769  |
| H | -0.8660850 | 3.4471840  | 5.6531813  |
| C | -1.4545727 | 2.8863660  | 3.6386997  |
| C | -0.8429924 | 1.4911642  | 3.7258105  |
| H | -1.6583527 | 0.7404953  | 3.6358029  |
| H | -0.4199062 | 1.3700833  | 4.7468367  |
| C | 0.1944179  | 1.1453265  | 2.6539649  |
| C | 1.4483686  | 1.8012627  | 2.5124137  |
| C | 2.2915673  | 1.5534371  | 1.3962077  |
| C | 1.9142269  | 0.5445752  | 0.4883119  |
| H | 2.5567768  | 0.3539638  | -0.3849530 |
| C | 0.7288298  | -0.1813978 | 0.6567826  |
| H | 0.4504648  | -0.9740374 | -0.0569195 |
| C | -0.1292262 | 0.1448139  | 1.7145971  |
| H | -1.1027476 | -0.3610933 | 1.8018117  |
| C | 3.5723394  | 2.3461478  | 1.1339756  |
| H | 4.1201766  | 1.8232674  | 0.3187237  |
| H | 4.2337424  | 2.3172867  | 2.0272026  |
| C | 3.3933204  | 3.8136264  | 0.7463793  |
| C | 2.5776826  | 4.2074485  | -0.3527484 |
| C | 2.2750957  | 5.5790816  | -0.5957365 |
| C | 2.9833070  | 6.5486163  | 0.1499272  |
| H | 2.7971736  | 7.6168534  | -0.0554031 |
| C | 3.9075372  | 6.1807813  | 1.1418462  |
| H | 4.4651784  | 6.9544439  | 1.6952780  |
| C | 4.0698604  | 4.8225252  | 1.4649306  |
| H | 4.7448365  | 4.5298927  | 2.2874218  |
| C | 1.2205859  | 6.0433651  | -1.6052424 |
| H | 1.1403700  | 7.1472043  | -1.5055553 |
| H | 1.5792886  | 5.8637318  | -2.6433665 |
| C | -0.1660640 | 5.4141994  | -1.4781108 |
| C | -1.0251879 | 5.7046723  | -0.3843322 |
| C | -2.2716905 | 5.0414594  | -0.2168884 |
| C | -2.6881380 | 4.1654678  | -1.2407991 |
| H | -3.6643449 | 3.6615879  | -1.1466185 |
| C | -1.8909469 | 3.9199050  | -2.3669659 |
| H | -2.2408777 | 3.2314636  | -3.1531296 |
| C | -0.6315505 | 4.5261914  | -2.4684370 |
| H | 0.0061668  | 4.3156551  | -3.3428559 |
| C | -3.1561437 | 5.2141295  | 1.0190993  |
| H | -3.3839029 | 6.2882163  | 1.1878827  |

|   |            |            |            |
|---|------------|------------|------------|
| H | -4.1383061 | 4.7432168  | 0.7935850  |
| C | 2.3210814  | 2.3830900  | 4.7085098  |
| H | 3.0623056  | 1.5567551  | 4.6089612  |
| H | 1.4778300  | 2.0199046  | 5.3398930  |
| C | 3.0028410  | 3.5621924  | 5.3866315  |
| H | 3.4041035  | 3.2075861  | 6.3684530  |
| H | 3.8716643  | 3.9079095  | 4.7718897  |
| C | 2.6305671  | 5.7400486  | 6.2824921  |
| H | 3.5704391  | 6.0920713  | 5.7875802  |
| H | 2.8912340  | 5.4411366  | 7.3278190  |
| C | 1.6295248  | 6.8832201  | 6.3491789  |
| H | 0.6491396  | 6.5064895  | 6.7338954  |
| H | 2.0124111  | 7.6379713  | 7.0795579  |
| C | 0.5712397  | 8.5979502  | 5.0717970  |
| H | 0.9395872  | 9.3803356  | 5.7802443  |
| H | -0.4456458 | 8.2826319  | 5.4147587  |
| C | 0.4783931  | 9.2205593  | 3.6871823  |
| H | -0.0421340 | 10.2055676 | 3.7793270  |
| H | 1.5075503  | 9.4175725  | 3.2947522  |
| C | -0.2605328 | 8.8374401  | 1.4536498  |
| H | 0.7800798  | 8.8850251  | 1.0452404  |
| H | -0.6897620 | 9.8688043  | 1.4022769  |
| C | -1.1224764 | 7.9351849  | 0.5834806  |
| H | -2.1659518 | 7.9186152  | 0.9731207  |
| H | -1.1425302 | 8.3546479  | -0.4484511 |
| C | 2.6796908  | 3.1515618  | -2.4728274 |
| H | 3.7863284  | 3.2592234  | -2.3929215 |
| H | 2.3037007  | 3.9760680  | -3.1202515 |
| C | 2.3429040  | 1.8354088  | -3.1492238 |
| H | 1.2694442  | 1.5867951  | -2.9804820 |
| H | 2.5123381  | 1.9489948  | -4.2458260 |
| C | 2.9968049  | -0.4810209 | -3.0688073 |
| C | 3.7978421  | -1.4707749 | -2.4547772 |
| H | 4.5352618  | -1.1647498 | -1.6949556 |
| C | 3.6379927  | -2.8172829 | -2.7961826 |
| H | 4.2625501  | -3.5719058 | -2.2897234 |
| C | 2.6870070  | -3.2328142 | -3.7582393 |
| C | 1.9316350  | -2.2293416 | -4.3920117 |
| H | 1.1932361  | -2.5046556 | -5.1616825 |
| C | 2.0706504  | -0.8676345 | -4.0582350 |
| H | 1.4362569  | -0.1267537 | -4.5667468 |
| O | -2.3936853 | -0.9003164 | -2.0343516 |
| H | -2.9989333 | -1.4625114 | -1.4974373 |
| H | -1.5342103 | -1.3852770 | -1.9097026 |

**Receptor-Cs<sup>+</sup>NO<sub>3</sub><sup>-</sup>.C<sub>2</sub>H<sub>5</sub>OH (G/P) Energy (Hartree):-4372.377550396943**

|    |            |            |            |
|----|------------|------------|------------|
| Cs | -0.2102166 | 0.0128714  | -1.0769384 |
| O  | -2.7403177 | -1.7715319 | -0.3016205 |
| H  | -4.0577869 | -2.8768412 | -1.3986407 |
| H  | -4.1108307 | -3.2215739 | 0.3557579  |

|   |            |            |            |
|---|------------|------------|------------|
| H | -1.8361859 | -4.3510005 | 0.2073161  |
| C | -2.4712482 | -4.1992217 | -0.6928269 |
| H | -3.0454164 | -5.1364987 | -0.8704664 |
| H | -1.7978591 | -4.0351244 | -1.5637928 |
| C | -3.4195298 | -3.0156965 | -0.4985350 |
| O | 2.7172388  | -2.0479575 | -0.8381778 |
| O | 2.0236487  | -0.6333993 | -3.3092479 |
| O | -0.6972969 | 1.3324346  | -6.3020587 |
| O | -0.5829438 | 3.5207197  | -8.2717035 |
| O | 1.3294136  | 5.7634695  | -7.8362078 |
| O | 2.5678610  | 6.5228273  | -5.1275103 |
| O | 1.8203767  | 3.5085705  | -3.3243914 |
| O | -2.0484945 | 2.3994666  | -2.0540818 |
| O | -2.5856516 | 2.0680078  | 0.8329348  |
| N | 2.1529958  | -2.2997516 | 5.4724074  |
| H | 1.4765534  | -1.9905589 | 4.7565334  |
| N | -0.0383266 | -4.6423641 | 4.4327707  |
| H | -0.1440897 | -3.7047855 | 4.0103674  |
| N | -2.5651458 | -2.6228275 | 5.2758676  |
| H | -1.8411632 | -2.3436921 | 4.5939854  |
| N | -0.3695353 | -0.2701089 | 6.2810415  |
| H | -0.2540846 | -0.5845394 | 5.3043611  |
| C | 2.5883429  | -1.5353261 | 6.5426426  |
| C | 3.5258569  | -2.3108936 | 7.2323494  |
| H | 4.0762412  | -2.0068628 | 8.1315687  |
| C | 3.6586609  | -3.5574421 | 6.5406263  |
| H | 4.3228305  | -4.3857775 | 6.8169948  |
| C | 2.7981972  | -3.5254595 | 5.4400922  |
| C | 2.5206601  | -4.5655030 | 4.3537382  |
| C | 1.1868701  | -5.2559489 | 4.6433300  |
| C | 0.9209907  | -6.5040455 | 5.2137826  |
| H | 1.6678947  | -7.2505663 | 5.5111840  |
| C | -0.4981661 | -6.6312028 | 5.3390679  |
| H | -1.0376703 | -7.5002293 | 5.7355945  |
| C | -1.0813146 | -5.4609896 | 4.8412155  |
| C | -2.5548143 | -5.1067714 | 4.6352777  |
| C | -3.0146469 | -3.9184004 | 5.4816696  |
| C | -3.9949320 | -3.8463665 | 6.4778962  |
| H | -4.5695278 | -4.6915012 | 6.8769274  |
| C | -4.1342380 | -2.4752529 | 6.8599552  |
| H | -4.8240350 | -2.0784146 | 7.6157658  |
| C | -3.2352886 | -1.7269401 | 6.0944356  |
| C | -2.9174994 | -0.2311806 | 6.1171819  |
| C | -1.5995859 | -0.0071970 | 6.8609379  |
| C | -1.3475826 | 0.4335217  | 8.1626675  |
| H | -2.1026018 | 0.7279074  | 8.9024320  |
| C | 0.0717216  | 0.4399423  | 8.3515769  |
| H | 0.6036251  | 0.7492730  | 9.2598028  |
| C | 0.6642400  | 0.0055686  | 7.1613610  |
| C | 2.1366194  | -0.0912357 | 6.7615617  |

|   |            |            |            |
|---|------------|------------|------------|
| C | 3.6492077  | -5.6299318 | 4.3843494  |
| H | 4.6307288  | -5.1515866 | 4.1805646  |
| H | 3.4647667  | -6.4043408 | 3.6097117  |
| H | 3.7080424  | -6.1342310 | 5.3725674  |
| C | -3.4128781 | -6.3356777 | 5.0085917  |
| H | -3.2885380 | -6.6183463 | 6.0759764  |
| H | -3.1258999 | -7.2087371 | 4.3843925  |
| H | -4.4886723 | -6.1215399 | 4.8313792  |
| C | -2.8007116 | -4.7877938 | 3.1317777  |
| H | -3.8772284 | -4.5631325 | 2.9592017  |
| H | -2.5183194 | -5.6629726 | 2.5052960  |
| H | -2.2080551 | -3.9152403 | 2.7815569  |
| C | -4.0501545 | 0.5084659  | 6.8770049  |
| H | -5.0205827 | 0.3535177  | 6.3596249  |
| H | -3.8367950 | 1.5977762  | 6.9119816  |
| H | -4.1495043 | 0.1404608  | 7.9205099  |
| C | 2.3733874  | 0.7280745  | 5.4580526  |
| H | 3.4483575  | 0.6902162  | 5.1727681  |
| H | 2.0870655  | 1.7915447  | 5.6180189  |
| H | 1.7820939  | 0.3471098  | 4.5965265  |
| C | 2.9960342  | 0.5302221  | 7.8838741  |
| H | 2.8732884  | -0.0131284 | 8.8451630  |
| H | 2.7070948  | 1.5904363  | 8.0483464  |
| H | 4.0715188  | 0.5001350  | 7.6063765  |
| C | 2.5431110  | -3.9094440 | 2.9476270  |
| C | 3.3498458  | -2.7764746 | 2.6877310  |
| H | 3.9487682  | -2.3336849 | 3.4993861  |
| C | 3.4034449  | -2.1894844 | 1.4187893  |
| H | 4.0242676  | -1.2976238 | 1.2374748  |
| C | 2.6537550  | -2.7305038 | 0.3532345  |
| C | 1.8874803  | -3.8929518 | 0.5721283  |
| H | 1.3006545  | -4.3499952 | -0.2390670 |
| C | 1.8385944  | -4.4626343 | 1.8595236  |
| H | 1.2168941  | -5.3597426 | 2.0129884  |
| C | 2.2888967  | -2.6972396 | -2.0353036 |
| H | 1.1796367  | -2.8293203 | -2.0461512 |
| H | 2.7489444  | -3.7098700 | -2.1115914 |
| C | 2.7412465  | -1.8805252 | -3.2305136 |
| H | 3.8354290  | -1.6842265 | -3.1525202 |
| H | 2.5669053  | -2.4880580 | -4.1482018 |
| C | 3.8421345  | 1.5150107  | -2.6036231 |
| H | 4.6942232  | 2.2314071  | -2.6563034 |
| H | 4.2532153  | 0.6013073  | -2.1205578 |
| C | 2.4927163  | 0.1835195  | -4.3446328 |
| C | 3.4284434  | 1.2005928  | -4.0330186 |
| C | 4.0094858  | 1.9148623  | -5.1006571 |
| H | 4.7669561  | 2.6849437  | -4.8750380 |
| C | 3.6374561  | 1.6668306  | -6.4288284 |
| H | 4.1050360  | 2.2315937  | -7.2520528 |
| C | 2.6342607  | 0.7266811  | -6.7003043 |

|   |            |            |             |
|---|------------|------------|-------------|
| H | 2.3041560  | 0.5610165  | -7.7397117  |
| C | 2.0334624  | -0.0253220 | -5.6701949  |
| C | 0.9267349  | -1.0163426 | -6.0170049  |
| H | 1.2672331  | -2.0596292 | -5.8309103  |
| H | 0.7570504  | -0.9493595 | -7.1140238  |
| C | -0.3944682 | -0.8237923 | -5.2840878  |
| C | -0.9058091 | -1.8523618 | -4.4669220  |
| H | -0.3452933 | -2.7995367 | -4.3838346  |
| C | -2.1208836 | -1.6961741 | -3.7826635  |
| H | -2.5231040 | -2.5187310 | -3.1734032  |
| C | -2.8134878 | -0.4779722 | -3.8672376  |
| H | -3.7480446 | -0.3388995 | -3.2979477  |
| C | -2.3433046 | 0.5772702  | -4.6759884  |
| C | -1.1536112 | 0.3683807  | -5.4263562  |
| C | -3.1212307 | 1.8878007  | -4.7267666  |
| H | -3.5348457 | 2.0438307  | -5.7475724  |
| H | -4.0078963 | 1.7742088  | -4.0652529  |
| C | -2.3355892 | 3.1398429  | -4.3550460  |
| C | -1.7724977 | 3.3247577  | -3.0669433  |
| C | -0.9408560 | 4.4328892  | -2.7706691  |
| C | -0.8086143 | 5.4377360  | -3.7518207  |
| H | -0.1956467 | 6.3269907  | -3.5303633  |
| C | -1.4194353 | 5.3121419  | -5.0065722  |
| H | -1.2937002 | 6.1019167  | -5.7644921  |
| C | -2.1438836 | 4.1531415  | -5.3139636  |
| H | -2.5579046 | 4.0221749  | -6.3262932  |
| C | -0.2209089 | 4.5734479  | -1.4380933  |
| H | -0.9577791 | 4.5424281  | -0.6056312  |
| H | 0.2204855  | 5.5960881  | -1.4032186  |
| C | 0.8719086  | 3.5571352  | -1.0900173  |
| C | 1.8349888  | 3.0676142  | -2.0199601  |
| C | 2.7972052  | 2.0878964  | -1.6429070  |
| C | 2.8403718  | 1.6820269  | -0.2913515  |
| H | 3.5912219  | 0.9357286  | 0.0164040   |
| C | 1.9504211  | 2.2082326  | 0.6578306   |
| H | 1.9962215  | 1.8749648  | 1.7064047   |
| C | 0.9646159  | 3.1193921  | 0.2493102   |
| H | 0.2336744  | 3.4984064  | 0.9828472   |
| C | -1.3418048 | 1.3242465  | -7.5854801  |
| H | -2.3802924 | 1.7250611  | -7.5100819  |
| H | -1.4090998 | 0.2790762  | -7.9708106  |
| C | -0.5538361 | 2.1437694  | -8.5903350  |
| H | 0.5012765  | 1.7742497  | -8.6328046  |
| H | -1.0120717 | 1.9580283  | -9.5975750  |
| C | 0.0543525  | 4.3113728  | -9.2609403  |
| H | -0.5599415 | 4.3380604  | -10.1984882 |
| H | 1.0529330  | 3.8819126  | -9.5281925  |
| C | 0.2606708  | 5.7319021  | -8.7649889  |
| H | 0.4901475  | 6.3859282  | -9.6457818  |
| H | -0.6869243 | 6.1132198  | -8.3053921  |

|   |            |            |            |
|---|------------|------------|------------|
| C | 1.6383445  | 7.0654938  | -7.3730659 |
| H | 0.7649589  | 7.5223653  | -6.8393875 |
| H | 1.8895130  | 7.7397723  | -8.2348013 |
| C | 2.8387118  | 7.0154438  | -6.4303745 |
| H | 3.6526730  | 6.4196630  | -6.9172471 |
| H | 3.2085321  | 8.0541733  | -6.2868980 |
| C | 2.3389765  | 5.1179413  | -5.0310356 |
| H | 3.0771799  | 4.5571093  | -5.6516682 |
| H | 1.3247585  | 4.8356088  | -5.3921570 |
| C | 2.4739958  | 4.7614252  | -3.5510590 |
| H | 3.5455578  | 4.7016363  | -3.2425238 |
| H | 1.9981285  | 5.5708255  | -2.9485157 |
| C | -3.2887236 | 2.6902349  | -1.3762298 |
| H | -4.1456173 | 2.5790263  | -2.0802403 |
| H | -3.2812384 | 3.7434525  | -1.0116507 |
| C | -3.5160199 | 1.7501674  | -0.2087524 |
| H | -4.5595030 | 1.9031512  | 0.1540377  |
| H | -3.4133764 | 0.6829935  | -0.5193001 |
| C | -2.7548308 | 1.4983315  | 2.0694528  |
| C | -2.0067038 | 2.0624292  | 3.1254798  |
| H | -1.3714559 | 2.9390957  | 2.9214903  |
| C | -2.0610800 | 1.5030850  | 4.4068687  |
| H | -1.4621686 | 1.9623003  | 5.2095043  |
| C | -2.8515822 | 0.3635228  | 4.6856556  |
| C | -3.6322650 | -0.1525475 | 3.6323703  |
| H | -4.2847308 | -1.0222863 | 3.8136286  |
| C | -3.5962575 | 0.3983251  | 2.3364606  |
| H | -4.1974701 | -0.0624821 | 1.5394279  |
| O | -0.1825329 | -1.7873036 | 3.7749854  |
| O | -0.8923903 | -2.1071561 | 1.7328654  |
| O | 0.3313991  | -0.3523718 | 2.1980972  |
| N | -0.2459565 | -1.3933985 | 2.5413435  |
| H | -2.1940539 | -1.8460631 | 0.5256248  |
